# Supplementary material for: Identification of novel genetic causes of Rett syndrome-like phenotypes
Source: HighWire-hosted journal article supplement (doi:10.1136/jmedgenet-2015-103568), 2016-01-06
Supplement: jmedgenet-2015-103568supp-new.pdf [file jmedgenet-2015-103568supp-new.pdf]

## Parte 1 - Detailed clinical and results description

|                                                      |    |
|------------------------------------------------------|----|
| Participants .....                                   | 4  |
| Patients selection and recruitment .....             | 4  |
| Clinical description of the patients .....           | 5  |
| Patient 1 .....                                      | 5  |
| Patient 2 .....                                      | 6  |
| Patient 3 .....                                      | 7  |
| Patient 4 .....                                      | 7  |
| Patient 5 .....                                      | 8  |
| Patient 6 .....                                      | 8  |
| Patient 7 .....                                      | 9  |
| Patient 8 .....                                      | 10 |
| Patient 9 .....                                      | 10 |
| Patient 10 .....                                     | 11 |
| Patient 11 .....                                     | 12 |
| Patient 12 .....                                     | 13 |
| Patient 13 .....                                     | 14 |
| Patient 14 .....                                     | 15 |
| Patient 15 .....                                     | 15 |
| Patient 16 .....                                     | 16 |
| Patient 17 .....                                     | 17 |
| Patient 18 .....                                     | 17 |
| Patient 19 .....                                     | 18 |
| Supplementary figures .....                          | 20 |
| Figure S1.1 – Patient 7 CNV (18q21.1 deletion) ..... | 20 |
| Figure S1.2 – Patient 16 (UPD) .....                 | 21 |
| Figure S1.3 – Patient 2 ( <i>HTT</i> ) .....         | 22 |
| Figure S1.4 – Patient 4 ( <i>SMARCA1</i> ) .....     | 23 |
| Figure S1.5 – Patient 5 ( <i>ZNF238</i> ) .....      | 23 |

|                                                    |    |
|----------------------------------------------------|----|
| Figure S1.6 – Patient 6 ( <i>LARP4</i> ) .....     | 24 |
| Figure S1.7 – Patient 8 ( <i>EIF2B2</i> ) .....    | 24 |
| Figure S1.8 – Patient 9 ( <i>GABBR2</i> ) .....    | 25 |
| Figure S1.9 – Patient 10 ( <i>MAGEL2</i> ) .....   | 25 |
| Figure S1.10 – Patient 11 ( <i>RHOBTB2</i> ) ..... | 26 |
| Figure S1.11 – Patient 11 ( <i>EIF4G1</i> ) .....  | 26 |
| Figure S1.12 – Patient 13 ( <i>TCTN2</i> ) .....   | 27 |
| Figure S1.13 – Patient 14 ( <i>STXBPI</i> ) .....  | 27 |
| Figure S1.14 – Patient 15 ( <i>SLC35A2</i> ) ..... | 28 |
| Figure S1.15 – Patient 17 ( <i>EEF1A2</i> ) .....  | 29 |
| Figure S1.16 – Patient 18 ( <i>CHD8</i> ) .....    | 29 |
| Figure S1.17 – Patient 19 ( <i>SHROOM4</i> ) ..... | 30 |
| Figure S1.18 – Patient 19 ( <i>ZFX</i> ) .....     | 30 |
| Supplementary tables .....                         | 31 |
| Table S1.1 – aCGH summary .....                    | 31 |
| Table S1.2 – WES variants in patient 1 .....       | 32 |
| Table S1.3 – WES variants in patient 2 .....       | 32 |
| Table S1.4 – WES variants in patient 3 .....       | 33 |
| Table S1.5 – WES variants in patient 4 .....       | 35 |
| Table S1.6 – WES variants in patient 5 .....       | 35 |
| Table S1.7 – WES variants in patient 6 .....       | 36 |
| Table S1.8 – WES variants in patient 8 .....       | 36 |
| Table S1.9 – WES variants in patient 9 .....       | 37 |
| Table S1.10 – WES variants in patient 10 .....     | 37 |
| Table S1.11 – WES variants in patient 11 .....     | 38 |
| Table S1.12 – WES variants in patient 12 .....     | 38 |
| Table S1.13 – WES variants in patient 13 .....     | 39 |
| Table S1.14 – WES variants in patient 14 .....     | 40 |
| Table S1.15 – WES variants in patient 15 .....     | 41 |

|                                                                |    |
|----------------------------------------------------------------|----|
| Table S1.16 – WES variants in patient 17 .....                 | 42 |
| Table S1.17 – WES variants in patient 18 .....                 | 42 |
| Table S1.18 – WES variants in patient 19 .....                 | 43 |
| Table S1.19 – Variants confirmed by to Sanger sequencing ..... | 44 |

## **Part 2 - Detailed methodology**

|                                                                                                          |    |
|----------------------------------------------------------------------------------------------------------|----|
| Array comparative genomic hybridization .....                                                            | 45 |
| Agilent 180K .....                                                                                       | 45 |
| Illumina HumanOmniExpress .....                                                                          | 46 |
| CNV interpretation .....                                                                                 | 47 |
| Quantitative PCR analysis .....                                                                          | 48 |
| Exome sequencing and data analysis .....                                                                 | 48 |
| Library preparation and SOLiD sequencing .....                                                           | 48 |
| Mapping and variant calling .....                                                                        | 49 |
| Analysis pipeline .....                                                                                  | 49 |
| Prioritization of candidate variants .....                                                               | 50 |
| Prioritization of candidate genes .....                                                                  | 51 |
| Sanger validation of selected candidate genes .....                                                      | 52 |
| Network analysis .....                                                                                   | 52 |
| Supplementary figures (SuppData_Part2).....                                                              | 54 |
| Figure S2.1 - Schematic representation of the workflow followed for the interpretation of the CNVs ..... | 54 |
| Figure S2.2 – WES coverage distribution .....                                                            | 55 |
| Figure S2.3 - WES bioinformatics analysis pipeline .....                                                 | 56 |
| Figure S2.4 – SNV interpretation workflow .....                                                          | 58 |
| Supplementary tables (SuppData_Part2).....                                                               | 59 |
| Table S2.1 – Primers for quantitative PCR .....                                                          | 59 |
| Table S2.2 – Primers for Sanger sequencing.....                                                          | 60 |
| References .....                                                                                         | 65 |

## **Part 1 - Detailed clinical and results description**

### **Participants**

#### **Patient selection and recruitment**

The Life and Health Sciences Research Institute of the School of Health Sciences at University of Minho offers the molecular diagnostic for Rett syndrome in Portugal since 2002 by *MECP2* genetic analysis (Sanger sequencing and dosage analysis by qPCR of all exons). The lab's work on Rett syndrome includes the setup of a clinical database and detailed clinical analysis of mutation-positive and mutation-negative cases and genotype-phenotype correlations (and also the behavioral, neuroanatomical and molecular study of a mouse model of the disease, the *Mecp2* KO mouse). Due to previous research on this pathology and in intellectual disability as a wider category, a large bank of DNA samples of patients and parents (as well as extensive clinical information) has been obtained. Patients were selected to participate in this project based on clinical suspicion of RTT (typical or atypical) according to the recently revised diagnostic criteria[1] and availability of both parents' DNA. The clinical information was gathered in an anonymous database. The enrollment of the patients and their families was done, after explanation about its purposes, potential pitfalls and eventual benefits by the referring doctor. Written informed consent was obtained for all the participants. This study was approved by the ethics committee of Hospital de Santo António, Centro Hospitalar do Porto.

## Clinical description of the patients

**Patient 1** – This girl is the middle child of a healthy non-consanguineous couple; her two male sibs are healthy. She was born at full term through vaginal delivery with a weight of 2630g (5-10<sup>th</sup> centile) and OFC of 33cm (10<sup>th</sup> centile). The neonatal period had no intercurrents. Head control occurred around 7 months, sitting without support and purposeful grasp at 12 months. Independent walking and language were never acquired. From an early age autistic traits (e.g. gaze avoidance) were noted. Partial complex seizures began when the child was around 3 years old; good control was attained with valproate and clonazepam. At 6 years, purposeful grasp was lost. Currently, at 15 years of age, the patient presents severe intellectual disability, swallowing difficulties, breathing disturbances and laughing spells. On physical exam the patient presents growth retardation and severe scoliosis; head circumference is on the 25<sup>th</sup> centile. On neurologic exam, hand washing and clapping stereotypies, as well as tremor of the upper limbs and dystonia of the lower limbs were noted. Brain MRI revealed frontal periventricular heterotopies and frontal and temporal atrophy. Because we did not consider these alterations to be a consequence of a peri-postnatal insult, neurometabolic disease or severe infection nor to explain the clinical presentation of the patient, we still included her in the study. Metabolic screening, karyotype, microarrays (Agilent 180k), *MECP2* and *CDKL5* Sanger sequencing showed no mutations.

Patient 1 presents a 83,5 kb paternal microdeletion in chromosome 3 (chr3:113,826,308-113,909,889) encompassing the *DRD3* (DOPAMINE RECEPTOR D3) gene. *DRD3* encodes the D3 subtype of the five (D1-D5) dopamine receptors. The activity of the D3 subtype receptor is mediated by G proteins, which inhibit adenylyl cyclase. This receptor is localized to the limbic areas of the brain, which are associated with cognitive, emotional, and endocrine functions. Association studies have linked *DRD3* to risk for

schizophrenia [2] and essential tremor [3]. Deletions encompassing exons of *DRD3* are not observed in DGV, which suggests that preservation of this gene is very relevant for health. *DRD3* has also been pointed out as being one of the most relevant genes in the 3q13.31 deletion syndrome, in which patients invariably present ID and frequently also craniofacial dysmorphic features (high arched palate, short philtrum and protruding lips), skeletal malformations (scoliosis, lordosis, thoracic kyphosis, joint contractures), postnatal overgrowth, agenesis of the corpus callosum and hypoplastic male genitalia. Behavioral problems such as autism and attention deficit disorders have also been described in some affected individuals [4,5]. No variants were found in the the *DRD3* gene using WES. A list of the variants found in the patient is presented in table S1.

**Patient 2** – This girl is the only child of a healthy non-consanguineous couple, whose family history is negative for developmental delay/intellectual disability. She was born at full term through vaginal delivery with a weight of 2780g (10<sup>th</sup> centile) and OFC of 33cm (10<sup>th</sup> centile). There were no intercurrents in the neonatal period. Head control occurred around 5 months, sitting with support at 6 months. Purposeful grasp was acquired at 3 months and lost around 6 months. Stagnation was noted at 8 months, coinciding with the beginning of complex partial seizures and lack of social interaction; virtually no acquisitions were achieved posteriorly, including gait or sphincter control. Currently, with 17 years of age, the patient presents severe intellectual disability, crying and laughing spells, respiratory dysfunction, frequent psychomotor agitation and sleep disturbances (waking up in the middle of the night). On neurologic exam, dystonia, bradykinesia, continuous stereotypies, tremor of the upper limbs and pyramidal signs of the lower limbs were noted, as well as swallowing difficulties. Brain MRI at the age of 4years and 10 months showed significant striatum atrophy (specially the caudate nuclei) as well as mild atrophy of the cortex and cerebellar vermis. Because we did not

consider these alterations to be a consequence of a peri-postnatal insult, neurometabolic disease or severe infection nor to explain the clinical presentation of the patient we still included her in the study. Metabolic screen, *MECP2* and *CDKL5* Sanger sequencing were normal. This patient has two compound heterozygous variants in *HTT* gene. *HTT* encodes a protein that plays a role in embryogenesis and that, when absent, results in the impairment of specification of ectodermal and mesodermal lineages.[6] Even though RTT is a neurodevelopmental disorder and Huntington Disease is a late onset neurodegenerative disease, they seem to share some features at the molecular and clinical level.[7,8] We believe that it is possible that the combination of two missense variants in *HTT* (though one is a rare polymorphism) in patient 2 may contribute for the RTT-like phenotype. Noteworthy, *HTT* homozygous loss of function variants have not been observed in any individual from the 1000 genomes project cohort suggesting that a *HTT* KO (and likely KD) has significant impact in health in humans, as seen in mice.[9,10] A list of the variants found in the patient is presented in table S2.

**Patient 3** – This girl is the youngest daughter of a healthy non-consanguineous couple; her brother and sister are healthy. She was born at full term through vaginal delivery with a weight of 2245g (<5<sup>th</sup> centile) and OFC of 32cm (<5<sup>th</sup> centile). The neonatal period had no interurrences but at 5 months West syndrome was diagnosed. Head control was achieved at 4 months, sitting without support at 11 months, first words at 12 months. Purposeful grasp was noted at 17 months but partially lost at 3 years. At 2 years she started walking (dyspraxic gait) and at 4 years she acquired sphincter control and the capability to say a few sentences (but not always purposeful; jargon and echolalia were frequent). Currently, with 13 years of age, the patient presents severe intellectual disability, poor eye contact, laughing spells, breathing disturbances (hyperpnea) and periods of

psychomotor agitation. In the neurologic exam, dystonia and hand washing stereotypies were observed until the age of 5 years. Metabolic screening, karyotype, microarrays (Agilent 180k), *MECP2* and *CDKL5* Sanger sequencing were normal. A list of the variants found in the patient is presented in table S3.

**Patient 4** – This girl is the daughter of a healthy non-consanguineous couple. She has a healthy brother and the remaining family history is negative for developmental delay/intellectual disability. She was born at full term through vaginal delivery with a weight of 3600g (50-75<sup>th</sup> centile) and OFC of 36cm (75<sup>th</sup> centile). Neonatal period had no intercurrents. At 7 months she started having complex partial seizures. Developmental acquisitions occurred very slowly, with sitting without support occurring around 14 months; walking and language were never attained. Purposeful grasp was acquired when she was 5 years old but lost 2 years later. Currently, with 25 years of age, the patient presents severe intellectual disability, autism, laughing spells, eye pointing and sleep disturbances (waking up in the middle of the night). On physical exam kyphosis/scoliosis, peripheral vasomotor disturbances and small cold feet were noted. The neurologic exam revealed stereotypies, dystonia, pyramidal signs. Microarrays (Agilent 180k), *MECP2* and *CDKL5* Sanger sequencing revealed no significant abnormalities. This patient carries a *de novo* variant in *SMARCA1* (alias *SNF2L*) gene. This gene encodes a chromatin remodeling ATPase involved in the control of Wnt signaling by regulation of proliferation and cell migration[11] and was also found to function antagonistically with Foxg1 in the regulation of brain size in mice.[12] A list of the variants found in the patient is presented in table S4.

**Patient 5** – This girl is the daughter of a healthy non-consanguineous couple, whose remaining family history is negative for developmental delay/intellectual disability; her elder brother is healthy. She was born at full term through vaginal delivery with a weight



of 3260g (25-50<sup>th</sup> centile) and OFC of 33cm (10-25<sup>th</sup> centile). Motor delay was present from the beginning, with head control achieved at 4 months, and seems to have been superimposed by regression at 8 months. Sitting with support was achieved at 12 months and tiptoe gait at 26 months. The child never learnt any words. Currently, at 15 years of age, the patient presents severe intellectual disability, screaming spells, bruxism when awake and breathing disturbances (apnea followed by hyperpnoea). The neurologic exam revealed microcephaly, stereotypies, and dystonia. Brain MRI, metabolic screen, karyotype and *MECP2* Sanger sequencing revealed no significant abnormalities. A list of the variants found in the patient is presented in table S5.

**Patient 6** – This girl is the only child of a healthy non-consanguineous couple; a maternal great aunt had ID and epilepsy reportedly after having had meningitis. She was born at full term through dystocic delivery (requiring forceps) with a weight of 3565g (50-75<sup>th</sup> centile), length of 49cm (25-50<sup>th</sup> centile) and OFC of 34,5cm (25-50<sup>th</sup> centile). Congenital hip dislocation was diagnosed and casts were used until 9 months of age. Head control was achieved around 3 months, sitting without support at 6 months, first words at 12 months and walking without support at 13 months. Regression occurred around 14-20 months of age, with loss of almost all previously acquired motor skills. Currently, at 13 years of age, the patient presents severe intellectual disability. On physical exam growth retardation was clear (weight and height < 5<sup>th</sup> centile), though the child was normocephalic. Atetosis, pyramidal signs and wallowing difficulties due to oropharyngeal dystonia were noted on the neurologic exam. Brain MRI revealed hyperintensities in the putamen and caudate nuclei. Because we did not consider these alterations to be a consequence of a peri-postnatal insult, neurometabolic disease or severe infection nor to explain the clinical presentation of the patient we still included her in the

study. Spectroscopy was normal. Metabolic screening, karyotype and *MECP2* Sanger sequencing revealed no significant abnormalities.

A *de novo* variant c.A1801G (N601D) in the *LARP4* (LA RIBONUCLEOPROTEIN DOMAIN FAMILY, MEMBER 4) gene was found in this patient, resulting in the substitution of an asparagine for an aspartic acid and predicted to be pathogenic by the SIFT prediction tool. *LARP4* encodes a La-related protein which can bind poly(A) RNA and interact with the poly(A) binding protein (PABP), contributing in this way for mRNA stability and homeostasis [13–15]. So far, no variants were described in *LARP4*. However, due to its participation in such an important biological process, known to be perturbed in several ID syndromes, we cannot ignore its eventual contribution to ID pathogenesis. A list of the variants found in the patient is presented in table S6.

**Patient 7** – This girl is the second child of a healthy non-consanguineous couple; her two sibs (one male and one female) are healthy. The couple has lost spontaneously two pregnancies (one in the 2<sup>nd</sup> and another in the 3<sup>rd</sup> trimester); gender and presence of other malformations in the fetuses is unknown. She was born full term through vaginal delivery with a weight of 3800g (75<sup>th</sup> centile) and OFC of 35,0cm (50<sup>th</sup> centile). Head control occurred around 6 months, sitting without support at 10 months, walking at 3,5 years, first words with 5 years. Stereotypies were noted when she was 2,5 years and for many years she didn't achieve purposeful grasp. She started having purposeful hand use around 6 years of age, but lost it between 9 and 10 years. When she was 7, she had the first hyperpnea episodes and tonico-clonic generalized seizures as well as nocturnal crying and laughing spells. Currently, as a 31 year old adult, the patient presents severe intellectual disability, bruxism when awake, eye pointing, episodes of psychomotor agitation. On physical exam kyphosis/scoliosis and peripheral vasomotor disturbance

were registered. Brain MRI, metabolic screening, karyotype and *MECP2* Sanger sequencing showed no significant abnormalities.

**Patient 8** – This girl is the first child of a healthy non-consanguineous couple. She has a healthy younger sister. A first grade maternal cousin died with spinal muscular atrophy type I. The remaining family history is negative for developmental delay/intellectual disability. She was born at full term through vaginal delivery with a weight of 2870g (10-25<sup>th</sup> centile) and OFC of 35cm (50<sup>th</sup> centile). Head control occurred around 6 months, sitting without support at 6 months. Deceleration of head growth was noted at 6 months. Walking without support and first words were achieved at 18 months and building sentences at 24 months. Regression occurred between 2 and 2,5 years with loss of language and purposeful grasp and coincided with the appearance of severe autism (screened with CARS and confirmed with ADI-R). As time went by, a cervical kyphosis became evident. Currently, at the age of 13 , the patient presents severe intellectual disability, epilepsy (well controlled with anti-epileptic drugs), psychomotor agitation, screaming spells and poor eye contact. On neurological exam the patient presents stereotypies, ataxia and dysmetria and peripheral vasomotor disturbances. Brain MRI, karyotype, metabolic screen, microarrays (Agilent 180k), *MECP2* and *CDKL5* Sanger sequencing revealed no significant abnormalities. A list of the variants found in the patient is presented in table S11.

**Patient 9** – This girl is the only child of a healthy non-consanguineous couple; the remaining family history is negative for developmental delay/intellectual disability. She was born at full term through vaginal delivery with a weight of 3140g (25<sup>th</sup> centile) and OFC of 34,0cm (25-50<sup>th</sup> centile). Stagnation of psychomotor development was noted early on (7 months) followed by regression, as well as lack of interest in exploring/interacting with the environment. Also at 7 months of life head growth

acceleration was documented with posterior stabilization at 2 years of age around the 98<sup>th</sup> centile. Head control was attained at around 5 months of age, sitting without support at 18 months and walking at 24 months. Purposeful grasp, language and sphincter control were never acquired. Currently, at 19 years of age, the patient presents severe intellectual disability, episodes of psychomotor agitation with crying spells, bruxism when awake, sleep disturbances (waking up in the middle of the night) and breathing disturbances (hyperventilation). On neurological exam stereotypies, dystonia (lower limbs) and swallowing difficulties were noted. Brain MRI revealed frontoparietal enlargement of CSF spaces. Metabolic screen and *MECP2* Sanger sequencing revealed no significant abnormalities. Patient 9 has a *de novo* variant in *GABBR2* gene. *GABBR2* encodes a Gamma-aminobutyric acid (GABA) type B receptor involved in neuronal activity inhibition and that is co-expressed with *FOXG1*. [16,17] Because GABA receptors play an important role in maintaining the excitatory-inhibitory balance in brain, the possibility that their deregulation may be associated with epilepsy is not to be dismissed. *GABBR2* expression was found to be reduced in lateral cerebella from subjects with schizophrenia, bipolar disorder and major depression [18] as well as in the cerebella of autistic patients. [19] Common insertion/deletion polymorphisms affecting *GABBR2* were described in patients with autism although without statistically significant enrichment when compared to control populations. [20] Additionally, *de novo* missense variants in *GABRR2* were identified in two different patients with infantile spasms. [21] This information brings new insight into the association of *GABRR2* with neurodevelopmental disorders and highlights the importance of clinical and WES data sharing. A list of the variants found in the patient is presented in table S9.

**Patient 10** – This female patient is the second child of a healthy non-consanguineous couple; her male sibling had absence seizures that later evolved to tonic-clonic seizures;

he is otherwise healthy. She was born full term through vaginal delivery with a weight of 2730g (10<sup>th</sup> centile) and OFC of 30,0cm (<2<sup>th</sup> centile). In the neonatal period the following dysmorphisms were described: beaked nose, widened space between the nipples, cauliflower anus, low implantation of the 5<sup>th</sup> toes. Head control occurred around 12 months, sitting without support at 36 months. Walking, talking and fine motor coordination were never attained. Epilepsy (partial seizures) started at 24 months, and so did midline hand stereotypies. When the child was 6 years old, she started having episodes of hyperpnea followed by apnea. Currently, with 24 years of age, the patient presents severe intellectual disability, has screaming spells and sleep disturbances (waking up in the middle of the night). On physical exam, growth retardation and microcephaly were apparent, as well as kyphosis/scoliosis and peripheral vasomotor disturbances. On neurological exam dystonia and swallowing difficulties were noted. Brain MRI, metabolic screening, karyotype and *MECP2* and *CDKL5* Sanger sequencing revealed no significant abnormalities. She was classified as a RTT patient (see table 1 in main text) in light of her loss of acquired hand skills, spoken language, gait abnormalities and stereotypical hand movements. A paternally inherited variant c.G2971A (p.V991I) in the *MAGEL2* (MAGE-LIKE 2) gene (OMIM 605283) was found, resulting in the substitution of a valine for an isoleucine, predicted not to have a functional impact by the SIFT, PolyPhen2 and Mutation Assessor prediction tools. However, given the imperfection of these tools it is not possible to exclude this variant as a basis of disease. *MAGEL2* is located at the critical region for Prader-Willi syndrome and paternally expressed in the CNS [22]. Recently, *de novo* truncating variant in the paternal allele of *MAGEL2* were described in patients with Prader-Willi Syndrome features, resulting in the loss of expression of functional protein [23]. The contribution of this alteration to the disease in this patient is not clear since it was not possible to determine the parental origin of the

variant in the father (and/or if it occurred *de novo* in the father, being then inherited). A list of the variants found in the patient is presented in table S8.

**Patient 11** – This girl is the second child of a non consanguineous couple. The mother has resting tremor and is suspected of having psychiatric disease, possibly early-onset dementia. The maternal grandmother is bed-ridden and dementiated. The father is suspected of also having psychiatric disease. Formal neurological and psychiatric evaluation of both parents is pending. The older male sibling is healthy and so are the remainder more distant relatives. She was born full term through dystocic delivery (forceps) with a weight of 2880g (10-25<sup>th</sup> centile), length 46,3cm (5-10<sup>th</sup> centile) and OFC of 34,3cm (25-50<sup>th</sup> centile). She gained head control at 3 months and sitting with support at 6 months. Between 6 and 9 months, her development seemed to stagnate and her head growth decelerated. At 9 months generalized epilepsy began, good response to anti-epileptic drugs. Currently, with 6 years of age, the patient presents severe intellectual disability, growth retardation, microcephaly, restless nights with diurnal sleep, bruxism when awake, diminished response to pain and eye pointing. On neurological exam the patient presents stereotypies, resting tremor and peripheral vasomotor disturbances. Brain MRI, metabolic screening, karyotype and *MECP2*, *CDKL5*, *UBE3A* and *PCDH19* Sanger sequencing revealed no significant abnormalities.

Patient 11 has a combination of two variants: a *de novo* variant in *RHOBTB2* gene and a homozygous variant in *EIF4G1* gene. *RHOBTB2* belongs to the Rho GTPases family and was found to bind to CUL3 and to be a substrate of the Cul3-based ubiquitin ligase complex, which is necessary for mitotic cell division.[24] Moreover, *de novo* nonsense variants in *CUL3* were identified in two separate next-generation sequencing reports using ASD probands,[25,26] further strengthening the relationship between *RHOBTB2* and neurodevelopmental disorders. RhoBTB2 is also likely to interfere with several

neuron related functions, given its participation in cytoskeleton and membrane trafficking networks.[27] *EIF4G1* encodes a translation initiation factor involved in the recruitment of mRNA to the 40S ribosomal subunit, which is a rate-limiting step during the initiation phase of protein synthesis.[28] Variants in *EIF4G1* have been associated with autosomal dominant forms of Lewy body dementia[29] and Parkinson disease (with and without dementia). However, the true pathogenicity of some of these variants remains unknown as it has been difficult to replicate the findings in populations with different genetic backgrounds.[30–33] In the Human Genome Mutation Database, the mutations that have been clearly associated with Parkinson disease are in heterozygosity, whereas our patient has a variant in homozygosity, which could justify an early and more severe presentation of neurological disease. A list of the variants found in the patient is presented in table S13.

**Patient 12** – This girl is the first child of a healthy non-consanguineous couple. She has a healthy younger sister; the remaining family history is also negative for developmental delay/intellectual disability. During pregnancy, intra-uterine growth retardation and single umbilical artery were detected. She was born at full term through vaginal delivery with a weight of 2150g (<5<sup>th</sup> centile), length of 42cm (<5<sup>th</sup> centile) and OFC of 30,5cm (2<sup>nd</sup> centile). During the neonatal period, left ptosis and cleft palate were diagnosed. Head control was achieved at around 6 months, sitting without support at 2 years, dyspraxic gait with support was eventually attained, but never independent walking. Even though she has hand stereotypies, hand use is preserved. At 10 years of age, on physical exam the child presented normal growth but severe microcephaly (weight: 35Kg, height:145cm, OFC:43cm), scoliosis/kyphosis and peripheral vasomotor disturbances. Her significant swallowing difficulties and gastroesophageal reflux prompted the decision of performing a gastrostomy. Currently, at 19 years of age, the patient presents severe intellectual

disability, eye pointing and breathing disturbances (hyperapnea). On neurological exam stereotypies and ataxia were noted. Brain MRI, metabolic screening, karyotype, microarrays (Agilent 180k) and *MECP2* Sanger sequencing revealed no significant abnormalities. A list of the variants found in the patient is presented in table S10.

**Patient 13** – This girl is the daughter of a healthy but possibly remotely consanguineous couple. She was born at full term through vaginal delivery with a weight of 3610g (50-75<sup>th</sup> centile) and OFC of 35cm (50<sup>th</sup> centile). The beginning of epilepsy (well controlled with therapy) at 24 months coincided with regression (namely loss of language) at 24 months. Currently, at the age of 20 years, the patient presents severe intellectual disability, crying and screaming spells, and restless nights with diurnal sleep. The patient is also affected with scoliosis/kyphosis and gastro-esophageal reflux disease. On neurological exam she presents pyramidal signs. Brain MRI, metabolic screening, karyotype and *MECP2* Sanger sequencing revealed no significant abnormalities.

Patient 13 presents two compound heterozygous variant in the *TCTN2* (TECTONIC FAMILY, MEMBER 2) (OMIM 613846) gene: a maternal c.C668T (p.T223M), resulting in a substitution of a threonine for a methionine, a very rare variant in the population (rs145374149, MAF T=0.0009/2) and predicted not to be pathogenic by in silico softwares; a paternal c.T1538C (p.I513T), resulting in a substitution of a isoleucine for a threonine predicted not to be pathogenic by in silico softwares. The *TCTN2* gene is a paralogous of *TCTN1* (TECTONIC FAMILY, MEMBER 1) (OMIM 609863) that plays a role in sonic hedgehog signaling pathway modulation [34]. Homozygous and compound heterozygous variants in *TCTN2* gene were described in patients with Meckel-Gruber 8 syndrome and Joubert syndrome [34,35]. A list of the variants found in the patient is presented in table S12.



**Patient 14** – This boy is the only child of a healthy non consanguineous couple. The older male sibling is healthy and so are the remainder more distant relatives. He was born at full term through C-section with a weight of 3444g (25-50<sup>th</sup> centile), length 51,5cm (50-75<sup>th</sup> centile) and OFC of 35,5cm (25-50<sup>th</sup> centile). At 1 month West syndrome was diagnosed; control of seizures has been difficult. Development was significantly delayed, with purposeful grasp and sitting being attained at 15 months. At 6 years old he started walking without support but few other psychomotor milestones were conquered. Currently, with 6 years of age, the patient presents severe intellectual disability, psychomotor agitation, restless nights with diurnal sleep and bruxism when awake. On physical exam it was confirmed that growth is within a normal interval. On neurological exam the patient presents poor eye contact, stereotypies, mioclonies, hyperventilation and decreased response to pain. Brain MRI showed moderate enlargement of pericerebral spaces – likely generalized brain atrophy. Because we did not consider these alterations to be a consequence of a peri-postnatal insult, neurometabolic disease or severe infection nor to explain the clinical presentation of the patient we still included him in the study. Metabolic screening, karyotype and *MECP2*, *CDKL5*, *ARX* Sanger sequencing revealed no significant abnormalities. A list of the variants found in the patient is presented in table S14.

**Patient 15** – This boy is the second child of a healthy non consanguineous couple. The older female sibling is healthy and so are the remainder more distant relatives. He was born at full term through vaginal delivery with a weight of 3250g (25-50<sup>th</sup> centile) and OFC of 33cm (10<sup>th</sup> centile). Food refusal and recurrent vomiting lead to growth deceleration: around 4 months of life the patient was crossing centiles both in weight (from 50<sup>th</sup> centile to 10<sup>th</sup> centile), height (from 25<sup>th</sup> centile to 10<sup>th</sup> centile) and OFC (from 10<sup>th</sup> centile to <3<sup>rd</sup> centile). Around 10 months the patient had his first apyretic seizure

(difficulty breathing, involuntary movements, gaze deviation). Since then, few psychomotor acquisitions were achieved and autism spectrum features were detected. Currently, with 8 years of age, the patient presents severe intellectual disability, psychomotor agitation, crying spells and disrupted sleep (wakes up in the middle of the night). On physical exam it was verified that the patient had caught up in terms of weight and height but microcephaly was still present. Some minor dysmorphism were observed: sunken eyes, prominent forehead, shortening of the 4<sup>th</sup> and 5<sup>th</sup> fingers, brittle nails. On neurological exam the patient presents stereotypies of the head and hands. Brain MRI (performed at 19 months and repeated at 4 years of age) showed global brain atrophy, thin corpus callosum and bilateral fronto-parietal periventricular heterotopies. Because we did not consider these alterations to be a consequence of a peri-postnatal insult, neurometabolic disease or severe infection nor to explain the clinical presentation of the patient we still included him in the study. EEG at 7 years showed a disorganized pattern during sleep, with predominantly occipital continuous lentification and paroxysmic activity. Metabolic screening, karyotype and *MECP2* Sanger sequencing revealed no significant abnormalities. A list of the variants found in the patient is presented in table S15.

**Patient 16** – This girl is the conception of a healthy and possibly remotely consanguineous couple. A paternal second grade male cousin is affected with idiopathic intellectual disability. She was born at full term through vaginal delivery with a weight of 3800g (75<sup>th</sup> centile) and OFC of 34,5cm (25-50<sup>th</sup> centile). At 6 months, coinciding with inaugural West syndrome there was developmental arrest, lack of interest in interacting/exploring the environment and head growth deceleration (currently being microcephalic). Currently, with 9 years of age, the patient presents severe intellectual disability, psychomotor agitation episodes, screaming and crying spells. On neurological exam the patient presents poor eye contact and lack of interest in social interaction,

repetitive behavior, stereotypies (hand wringing) and ataxia. Brain MRI, metabolic screening, karyotype and *MECP2* and *CDKL5* Sanger sequencing had no significant abnormalities. A list of the variants found in the patient is presented in table S16.

**Patient 17** – This girl is the second child of a healthy non-consanguineous couple; her older brother is healthy and so are more distant relatives. She was born at full term through dystocic delivery (vacuum extraction) with a weight of 3700g (50-75<sup>th</sup> centile). Developmental delay was noticeable all along, with further stagnation at 10 months with the beginning of epilepsy. She sat at 16 months, walked with support at 30 months and without support at 48 months. Her first words were learnt at 36 months but she never constructed sentences. Currently, with 13 years of age, the patient presents severe intellectual disability, autistic behavior, crying spells and bruxism when awake. Disrupted sleep became so problematic that hypnotics were prescribed. On neurological exam the patient presents poor eye contact, stereotypies, respiratory dysfunction (hyperpnoea alternating with apneas) and diminished response to pain. Brain MRI showed global enlargement of the CSF space suggestive of generalized brain atrophy. Because we did not consider these alterations to be a consequence of a peri-postnatal insult, neurometabolic disease or severe infection nor to explain the clinical presentation of the patient we still included her in the study. Metabolic screening, karyotype, FISH for 17p11.2 (Smith-Magenis syndrome), DNA methylation analysis of 15q11.2-q13 (AS/PWS critical region), *MECP2* and *UBE3A* Sanger sequencing revealed no significant abnormalities. A list of the variants found in the patient is presented in table S17.

**Patient 18** – This girl is the first child born to a non-consanguineous couple. Her mother has mild intellectual disability; the remaining family history is negative for developmental delay/intellectual disability. She was born at full term from dystocic delivery (vacuum extraction) with a weight of 2770g (5-10<sup>th</sup> centile), length 49,0cm (25-

50<sup>th</sup> centile) and OFC of 33,3cm (10-25<sup>th</sup> centile). She sat without support at 11 months, said her first words at 12 months (but did not develop language), achieved purposeful grasp at 18 months and walked without support at 30 months. Also around 30 months, ASD was suspected on the basis of hand flapping, temper tantrums, autoaggression. Currently, at 9 years old, the patient presents severe intellectual disability, bruxism when awake, crying spells and disrupted sleep (waking up in the middle of the night). On physical exam her growth is normal. On neurological exam the patient presents stereotypies (hand flapping), peripheral vasomotor disturbances, ataxia, diminished response to pain. Brain MRI, metabolic screening, karyotype, microarrays (Agilent 180k), *MECP2* Sanger sequencing revealed no significant abnormalities.

In this patient a maternally inherited variant c.G3226T (A1076S) in *CHD8* (CHROMODOMAIN HELICASE DNA-BINDING PROTEIN 8) (OMIM 610528) was found, resulting in the substitution of an alanine for a serine and predicted by SIFT and Mutation Taster to be damaging. *CHD8* encodes a chromodomain helicase DNA-binding protein that participates in the Wnt- $\beta$ -catenin signaling pathway through histone H1 recruitment during development [36]. In rat, duplin (corresponding to *CHD8*), binds to beta-catenin inhibiting the binding of Tcf to beta-catenin and consequently inhibiting the Wnt signaling pathway [37]. Noteworthy, *CHD8* seems to be co-expressed with *MECP2*, the main cause of RTT [38,39]. Rare *de novo* variants in *CHD8* have been described as associated with autism spectrum disorder in recent years [26,40–43]. A list of the variants found in the patient is presented in table S18.

**Patient 19** – This boy is the child of a healthy non-consanguineous couple; his younger sister is healthy and so are the remainder distant relatives. He was born at full term through dystocic delivery (vacuum extraction) with a weight of 3300g (25-50<sup>th</sup> centile), length 49,0cm (25-50<sup>th</sup> centile) and OFC of 34,0cm (25-50<sup>th</sup> centile). He sat without

support at 6-9 months, acquired purposeful grasp at 2 years and controlled sphincters at 10 years. Currently, with 14 years of age, the patient presents severe intellectual disability, dyspraxic gate, eye pointing, bruxism when awake and scoliosis/kyphosis. He is also affected with gastroesophageal reflux. On neurologic exam he presents microcephaly, peripheral vasomotor disturbances, diminished response to pain and autistic traits (including lack of interest in social interaction). The patient does not present short stature, hip dislocation or epilepsy. Brain MRI, metabolic screening, karyotype, microarrays (Agilent 180k) and *MECP2* Sanger sequencing revealed no significant abnormalities. A list of the variants found in the patient is presented in table S19.

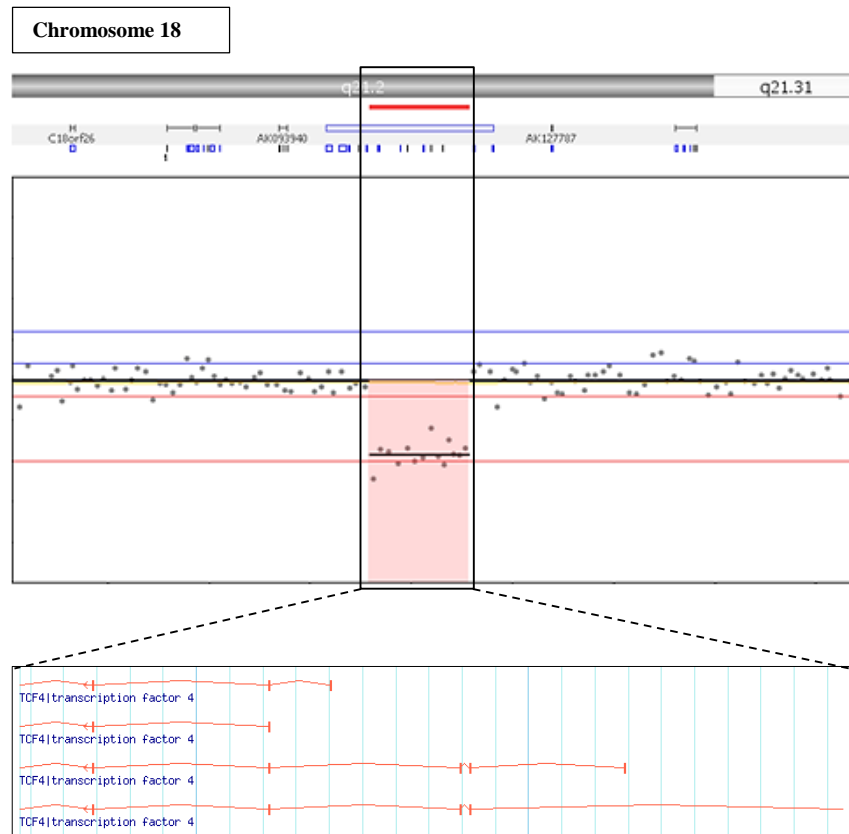

**Figure S1.1** – Schematic representation of the 18q21.1 deletion in patient 7. It is possible to observe the decrease in the LRR of the probes contained in that region when compared to neighboring probes (LRR=0). The deletion is 250Kb long and encompasses two genes: *TCF4* and *MIR4529*.



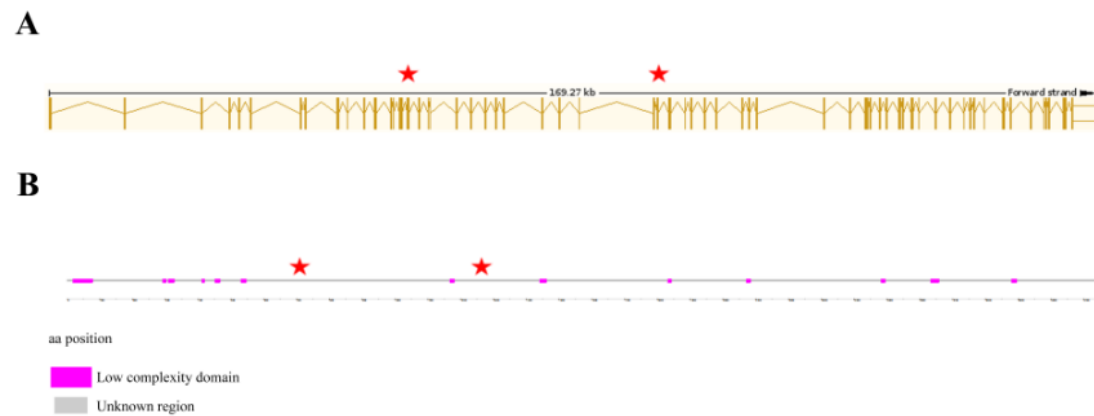

**Figure S1.3 – Schematic representation of the *HTT* gene and HTT protein domains.** The gene structure was retrieved from Ensembl and the domain structure was determined based on SMART webtool. The variant identified in this gene are indicated by a red star with its respective location at exons and protein levels (aa). Both variants affect an unknown region/domain.



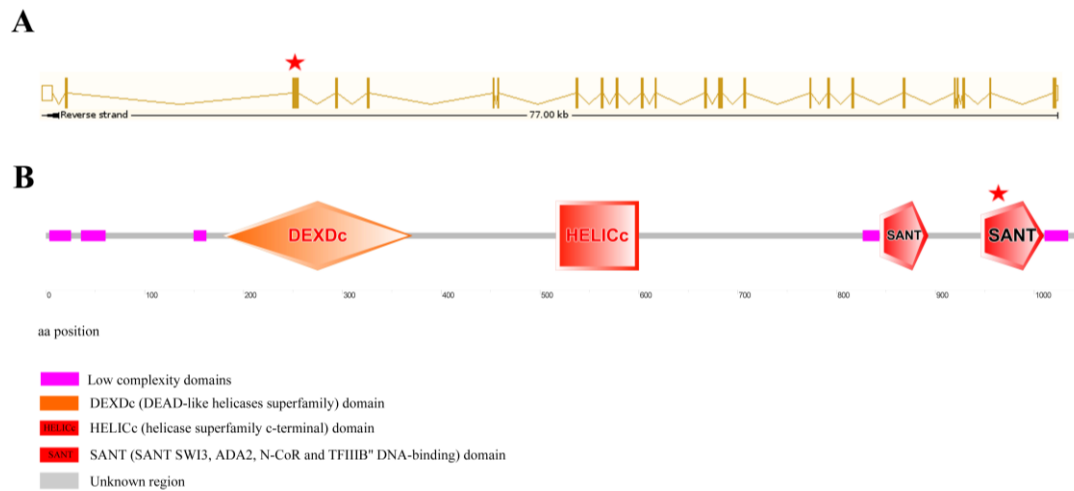

**Figure S1.4 – Schematic representation of the *SMARCA1* gene and protein domains.** The gene structure was retrieved from Ensembl and the domain structure was determined based on SMART webtool. The variant identified in this gene is indicated by a red star with its respective location at exon and protein levels (aa). The variant is located in the SANT domain, which is present in the subunits of many chromatin-remodelling complexes [44].

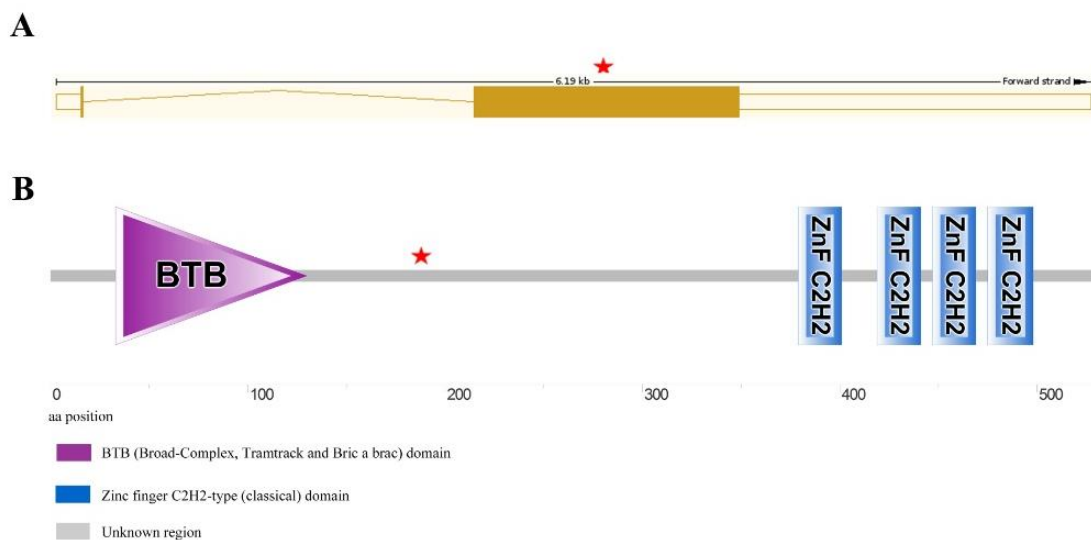

**Figure S1.5 – Schematic representation of the *ZNF238* gene and protein domains.** The gene structure was retrieved from Ensembl and the domain structure was determined based on SMART webtool. The variant identified in this gene is indicated by a red star with its respective location at exon and protein levels (aa). The variant affects an unknown region/domain.

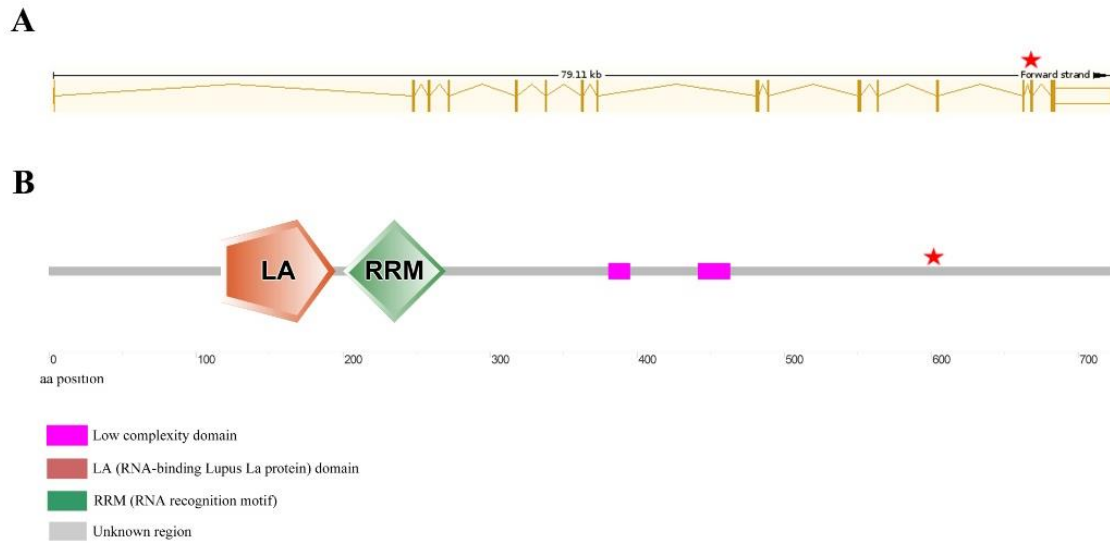

**Figure S1.6 – Schematic representation of the *LARP4* gene and protein domains.** The gene structure was retrieved from Ensembl and the domain structure was determined based on SMART webtool. The variant identified in this gene is indicated by a red star with its respective location at exon and protein levels (aa). The variant affects an unknown region/domain.

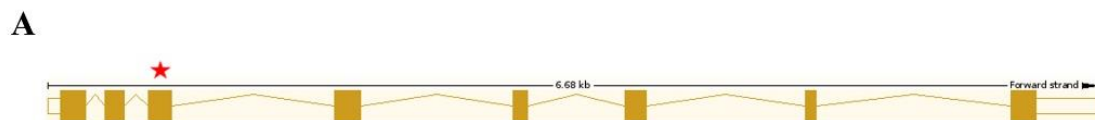

**Figure S1.7 – Schematic representation of the *EIF2B2* gene structure.** The gene structure was retrieved from Ensembl. The variant identified in this gene is indicated by a red star with its respective location at exon level.

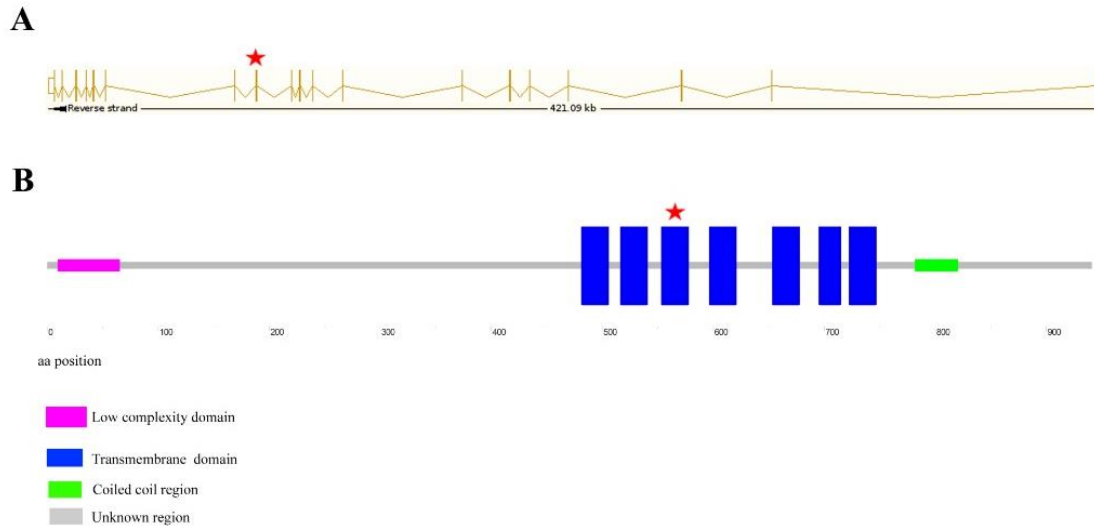

**Figure S1.8 – Schematic representation of the *GABBR2* gene and protein domains.** The gene structure was retrieved from Ensembl and the domain structure was determined based on SMART webtool. The variant identified in this gene is indicated by a red star with its respective location at exon and protein levels (aa). The variant is located in one of the transmembrane helix regions for the protein.

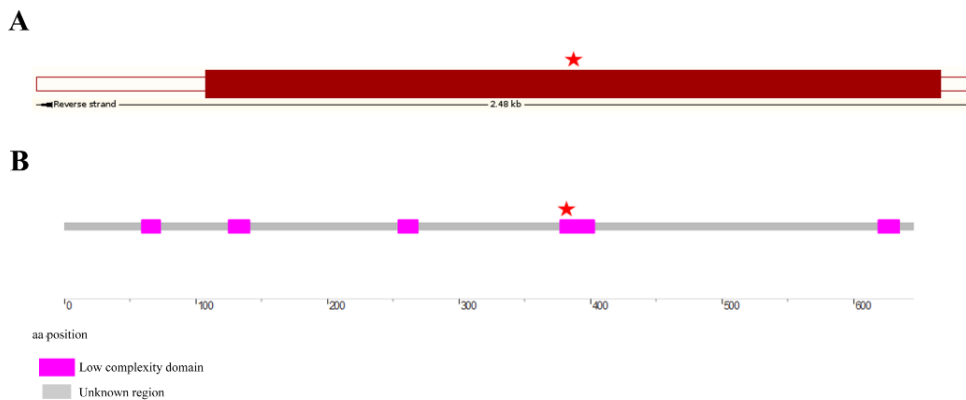

**Figure S1.9 – Schematic representation of the *MAGEL2* gene and protein domains.** The gene structure was retrieved from Ensembl and the domain structure was determined based on SMART webtool. The variant identified in this gene is indicated by a red star with its respective location at exon and protein levels (aa). The variant is located in one of the low compositional complexity regions for the protein.

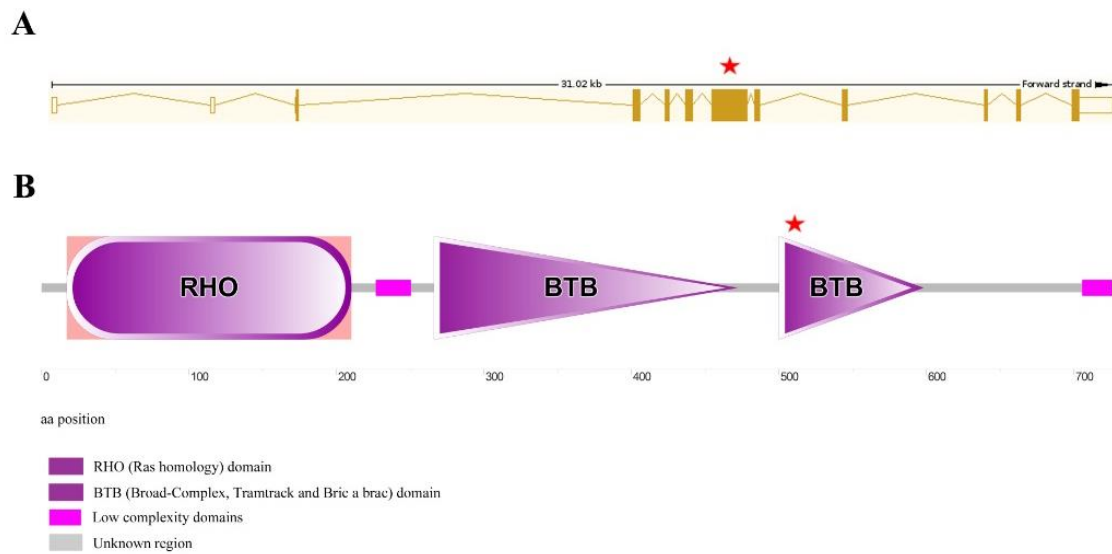

**Figure S1.10 – Schematic representation of the *RHOBTB2* gene and protein domains.** The gene structure was retrieved from Ensembl and the domain structure was determined based on SMART webtool. The variant identified in this gene is indicated by a red star with its respective location at exon and protein levels (aa). The variant is located in the BTB domain of the protein, which is known to mediate homomeric dimerisation and, in some circumstances, heteromeric dimerization [45].

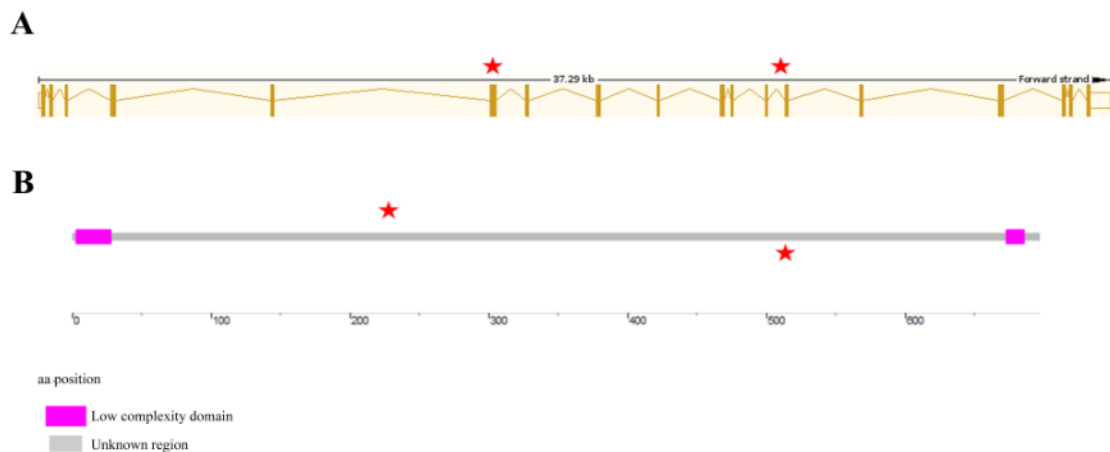

**Figure S1.11 – Schematic representation of the *EIF4G1* gene and protein domains.** The gene structure was retrieved from Ensembl and the domain structure was determined based on SMART webtool. The variant identified in this gene is indicated by a red star with its respective location at exon and protein levels (aa). The variant affects an unknown region/domain.

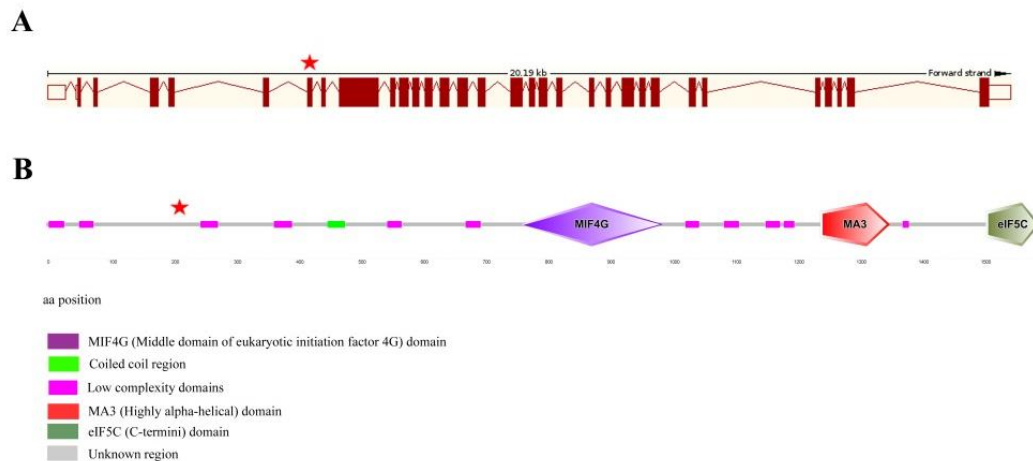

**Figure S1.12 – Schematic representation of the *TCTN2* gene and protein domains.** The gene structure was retrieved from Ensembl and the domain structure was determined based on SMART webtool. The variant identified in this gene is indicated by a red star with its respective location at exon and protein levels (aa). The variant affects an unknown region/domain.

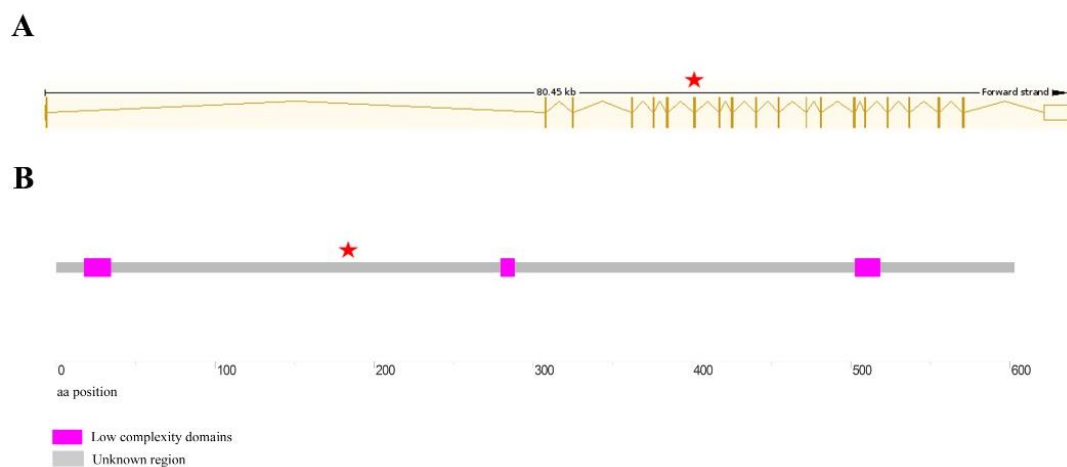

**Figure S1.13 – Schematic representation of the *STXBPI* gene and protein domains.** The gene structure was retrieved from Ensembl and the domain structure was determined based on SMART webtool. The variant identified in this gene is indicated by a red star with its respective location at exon and protein levels (aa). The variant affects an unknown region/domain.

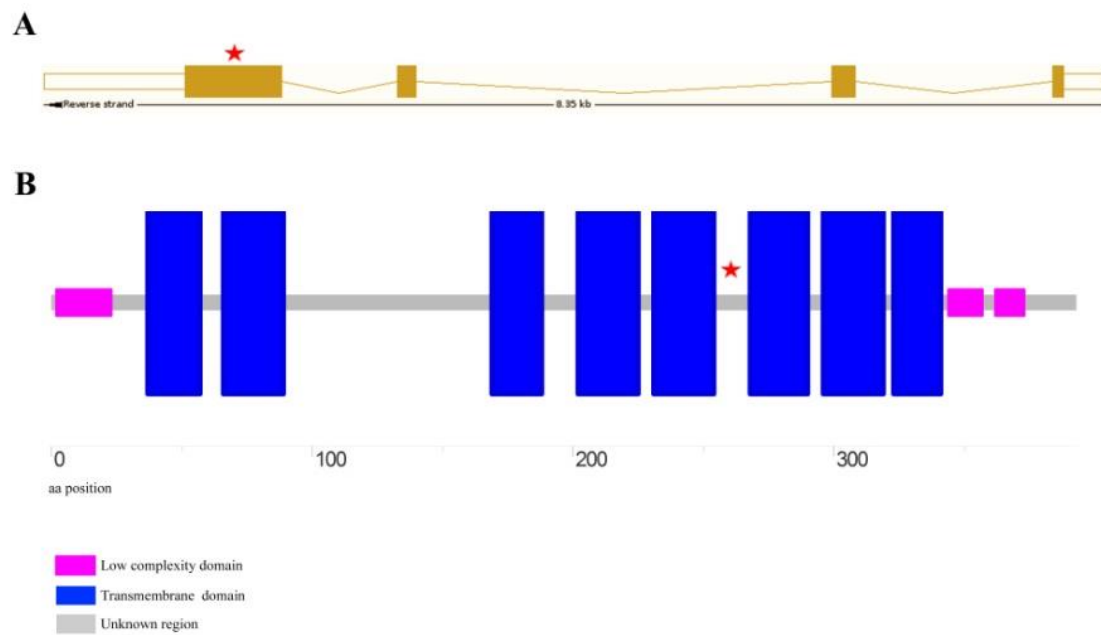

**Figure S1.14 – Schematic representation of the *SLC35A2* gene and protein domains.** The gene structure was retrieved from Ensembl and the domain structure was determined based on SMART webtool. The variant identified in this gene is indicated by a red star with its respective location at exon and protein levels (aa). The variant affects an unknown region/domain.

A

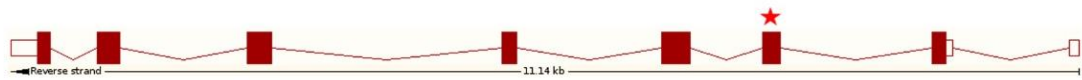

**Figure S1.15 – Schematic representation of the *EEF1A2* gene structure.** The gene structure was retrieved from Ensembl. The variant identified in this gene is indicated by a red star with its respective location at exon level.

A

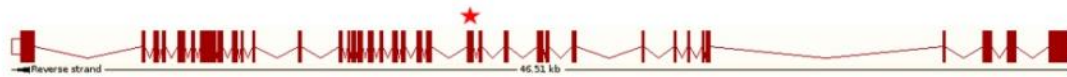

B

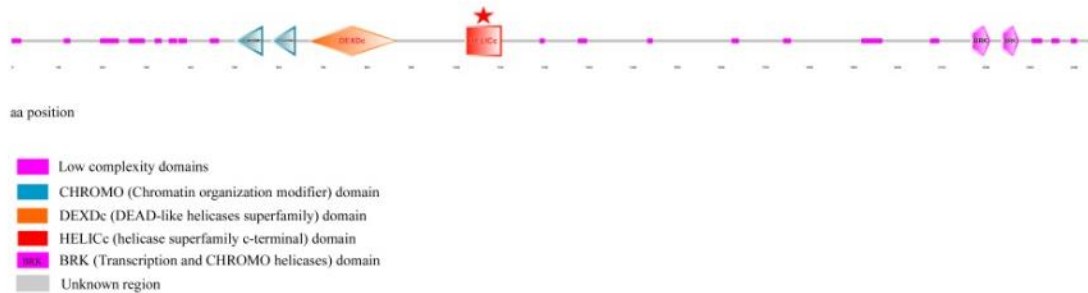

**Figure S1.16 – Schematic representation of the *CHD8* gene and protein domains.** The gene structure was retrieved from Ensembl and the domain structure was determined based on SMART webtool. The variant identified in this gene is indicated by a red star with its respective location at exon and protein levels (aa). The variant affects the HELICc domain, which corresponds to the C-terminal domain found in proteins belonging to the helicase superfamilies 1 and 2 [46].

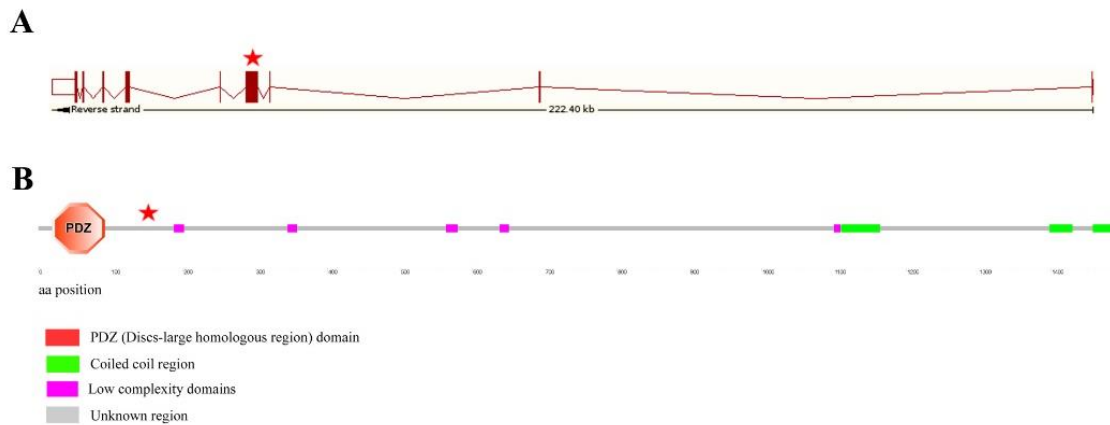

**Figure S1.17 – Schematic representation of the *SHROOM4* gene and protein domains.** The gene structure was retrieved from Ensembl and the domain structure was determined based on SMART webtool. The variant identified in this gene is indicated by a red star with its respective location at exon and protein levels (aa). The variant affects an unknown region/domain.

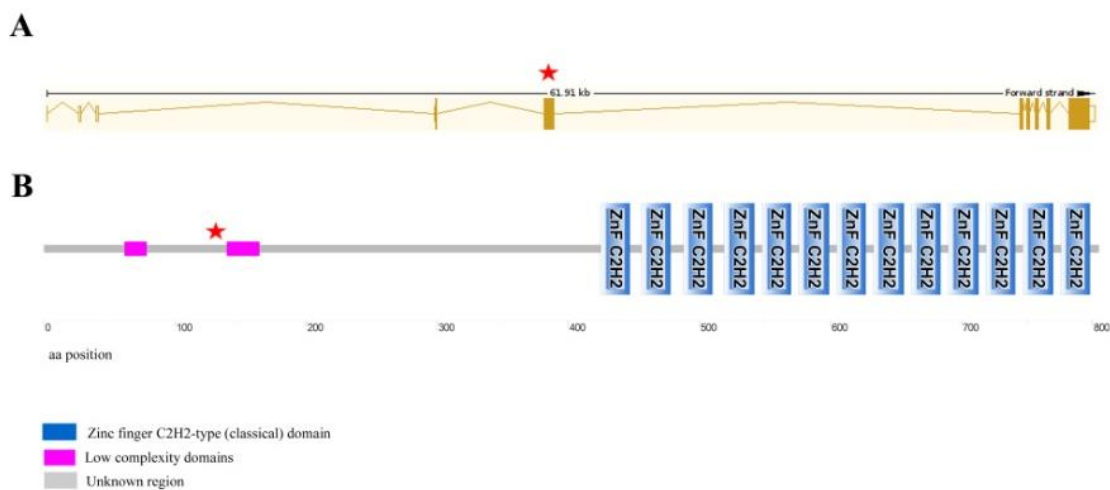

**Figure S1.18 – Schematic representation of the *ZFX* gene and protein domains.** The gene structure was retrieved from Ensembl and the domain structure was determined based on SMART webtool. The variant identified in this gene is indicated by a red star with its respective location at exon and protein levels (aa). The variant affects an unknown region/domain.



## Supplementary tables

**Table S1.1 – Summary of the aCGH findings.**

| ID | Coordinates (hg19)       | Size (bp)   | #Probes | Algorithm* | %Rare | Type | Median LRR | Gene symbols                       | Comments                                                                                                                                                                                                                                                              |
|----|--------------------------|-------------|---------|------------|-------|------|------------|------------------------------------|-----------------------------------------------------------------------------------------------------------------------------------------------------------------------------------------------------------------------------------------------------------------------|
| 1  | chr2:194920864-194985510 | 64,646      | 12      | GN,PN,QT   | 100%  | 1    | -0.46      | -                                  | CNV does not encompass any genes                                                                                                                                                                                                                                      |
|    | chr2:42494273-42537995   | 43,722      | 16      | PN,QT      | 100%  | 3    | 0.42       | <i>EML4</i>                        | Plotted on GenomeStudio:waves                                                                                                                                                                                                                                         |
|    | chr3:113826308-113909889 | 83,581      | 27      | GN,PN,QT   | 100%  | 1    | -0.37      | <i>DRD3</i>                        | inherited from healthy father                                                                                                                                                                                                                                         |
| 2  | -                        | -           | -       | -          | -     | -    | -          | -                                  | Not performed                                                                                                                                                                                                                                                         |
| 3  | -                        | -           | -       | -          | -     | -    | -          | -                                  | No relevant CNVs to report                                                                                                                                                                                                                                            |
| 4  | chr11:38998451-39234089  | 235,638     | 23      | GN,PN,QT   | 100%  | 1    | -0.40      | -                                  | CNV does not encompass any genes                                                                                                                                                                                                                                      |
| 5  | -                        | -           | -       | -          | -     | -    | -          | -                                  | Not performed                                                                                                                                                                                                                                                         |
| 6  | chr8:22188330-22288995   | 100,665     | 31      | PN,QT      | 100%  | 3    | 0.2        | <i>PIWIL2</i> ;<br><i>SLC39A14</i> | <i>PIWIL2</i> belongs to the Argonaute family (role in development and maintenance of germline stem cells); <i>SLC39A14</i> shows structural characteristics of zinc transporter. DECIPHER patient269297 has a 150kb duplication ( <i>SLC39A14</i> ; <i>PPP3CC</i> ). |
| 7  | chr18:52996207-53243605  | 247,399     | 14      | FASST2     | 100%  | 1    | -0.8       | <i>MIR4529</i> ,<br><i>TCF4</i>    | Loss of functions mutations and exonic or whole-gene deletions of <i>TCF4</i> cause Pitt-Hopkins syndrome                                                                                                                                                             |
| 8  | chr11:37476792-37532517  | 55,725      | 18      | GN,PN,QT   | 100%  | 1    | -0.57      | -                                  | CNV does not encompass any genes                                                                                                                                                                                                                                      |
|    | chr18:65848177-65897747  | 49,570      | 24      | GN,PN,QT   | 100%  | 1    | -0.45      | -                                  | CNV does not encompass any genes                                                                                                                                                                                                                                      |
| 9  | -                        | -           | -       | -          | -     | -    | -          | -                                  | No relevant CNVs to report                                                                                                                                                                                                                                            |
| 10 | chr6:65669109-65781547   | 112,438     | 26      | GN,PN,QT   | 100%  | 1    | -0.41      | <i>EYS</i>                         | <i>EYS</i> is expressed in the photoreceptor layer of the retina. Mutated in autosomal recessive retinitis pigmentosa. Likely the patient is a carrier for retinitis pigmentosa.                                                                                      |
|    | chr14:46325257-46435899  | 110,642     | 24      | GN,PN,QT   | 100%  | 1    | -0.44      | -                                  | CNV does not encompass any genes                                                                                                                                                                                                                                      |
| 11 | chr21:44823479-44837555  | 14,076      | 12      | PN,QT      | 100%  | 3    | 0.22       | <i>SIK1</i>                        | <i>SIK1</i> : salt-inducible kinase 1. Function not well understood                                                                                                                                                                                                   |
| 12 | chr4:61339224-61395456   | 56,232      | 15      | PN,QT      | 100%  | 3    | 0.40       | -                                  | CNV does not encompass any genes                                                                                                                                                                                                                                      |
|    | chr13:92874384-92968290  | 93,906      | 38      | GN,PN,QT   | 100%  | 1    | -0.49      | -                                  | CNV does not encompass any genes                                                                                                                                                                                                                                      |
| 13 | chr4:13102351-13221390   | 119,039     | 32      | GN,PN,QT   | 100%  | 1    | -0.39      | -                                  | CNV does not encompass any genes                                                                                                                                                                                                                                      |
| 14 | -                        | -           | -       | -          | -     | -    | -          | -                                  | No relevant CNVs to report                                                                                                                                                                                                                                            |
| 15 | -                        | -           | -       | -          | -     | -    | -          | -                                  | No relevant CNVs to report                                                                                                                                                                                                                                            |
| 16 | chr3:234726-192095111    | 191,860,385 | 3032    | GN,PN,QT   | 100%  | 2,3  | 0.11       | ≈1900 genes                        | Mosaic UPD chr3                                                                                                                                                                                                                                                       |
| 17 | chr9:5377177-5423103     | 45,926      | 22      | GN,PN,QT   | 100%  | 1    | -0.47      | -                                  | CNV does not encompass any genes                                                                                                                                                                                                                                      |
| 18 | chr9:5373441-5418334     | 44,893      | 22      | GN,PN,QT   | 100%  | 1    | -0.51      | -                                  | CNV does not encompass any genes                                                                                                                                                                                                                                      |
| 18 | chr16:78045800-78092197  | 46,397      | 17      | GN,PN,QT   | 100%  | 1    | -0.45      | <i>CLEC3A</i>                      | <i>CLEC3A</i> : C-type lectin domain family 3, member A. Function not well understood                                                                                                                                                                                 |
| 19 | -                        | -           | -       | -          | -     | -    | -          | -                                  | No relevant CNVs to report                                                                                                                                                                                                                                            |

\*Algorithms: GN – GNOSIS; PN – PennCNV; QT – QuantiSNP; FASST2 - FASST2 Segmentation

**Table S1.2 – Variants found by WES in patient 1.**

|           |       |        |      |                    |               |      |          | Functional impact prediction |           |          |        |      |          | Nervous system function | Sanger confirmation |
|-----------|-------|--------|------|--------------------|---------------|------|----------|------------------------------|-----------|----------|--------|------|----------|-------------------------|---------------------|
| sample_id | gene  | snp135 | freq | SNP_id             | class         | chr  | coverage | SIFT                         | PolyPhen2 | MutAsse. | Condel | Pmut | MutTast. |                         |                     |
| Patient   | FNDC7 |        |      | chr1 109265010 G A | nonsynonymous | chr1 | 82       | P                            | NP        | NP       | NP     | NP   | P        | No info                 | Not performed       |
| Mother    | FNDC7 |        |      | chr1 109265010 G A | nonsynonymous | chr1 | 53       | P                            | NP        | NP       | NP     | NP   | P        | No info                 | Not performed       |
| Patient   | FNDC7 |        |      | chr1 109273387 T A | nonsynonymous | chr1 | 195      | P                            | NP        | NP       | NP     | NP   | NP       | No info                 | Not performed       |
| Father    | FNDC7 |        |      | chr1 109273387 T A | nonsynonymous | chr1 | 141      | P                            | NP        | NP       | NP     | NP   | NP       | No info                 | Not performed       |

indels\_de novo

| sample_id | gene | snp137 | freq | indel_id                           | class    | chr   | start    | end      | Nervous system function | type | coverage | Sanger confirmation                      |
|-----------|------|--------|------|------------------------------------|----------|-------|----------|----------|-------------------------|------|----------|------------------------------------------|
| Patient   | NXF1 |        |      | chr11 62569105 62569105 - AGCTACAG | splicing | chr11 | 62569105 | 62569105 | Yes                     | ins  | 88       | Confirmed. Not <i>de novo</i> (maternal) |

**Table S1.3 - Variants found by WES in patient 2.**

| denovo    |       |             |            |                    |               |       |          | Functional impact prediction |           |          |        |      |          | Nervous system function | Sanger confirmation                      |
|-----------|-------|-------------|------------|--------------------|---------------|-------|----------|------------------------------|-----------|----------|--------|------|----------|-------------------------|------------------------------------------|
| sample_id | gene  | snp135      | freq       | SNP_id             | class         | chr   | coverage | SIFT                         | PolyPhen2 | MutAsse. | Condel | Pmut | MutTast. |                         |                                          |
| Patient   | RIN2  | rs183028833 | T=0.0009/2 | chr20 19867384 C T | nonsynonymous | chr20 | 16       | P                            | NP        | NP       | NP     | NP   | NP       | Yes/Likely              | Confirmed. Not <i>de novo</i> (maternal) |
| Patient   | CCRL2 |             |            | chr3 46449931 A G  | nonsynonymous | chr3  | 75       | P                            | P         | P        | P      | NP   | NP       | Unlikely                | Not performed                            |

recessive\_compound

| sample_id | gene | snp135      | freq        | SNP_id             | class         | chr  | coverage |    |    |    |    |    |    |          | Sanger confirmation |
|-----------|------|-------------|-------------|--------------------|---------------|------|----------|----|----|----|----|----|----|----------|---------------------|
| Patient   | HTT  |             |             | chr4 3133374 C T   | nonsynonymous | chr4 | 20       | NP | P  | P  | P  | NP | P  | Yes      | Confirmed. Present  |
| Father    | HTT  |             |             | chr4 3133374 C T   | nonsynonymous | chr4 | 21       | NP | P  | P  | P  | NP | P  | Yes      | Confirmed. Present  |
| Patient   | HTT  | rs34315806  | T=0.0234/51 | chr4 3162034 C T   | nonsynonymous | chr4 | 114      | NP | P  | Np | NP | NP | P  | Yes      | Confirmed. Present  |
| Mother    | HTT  | rs34315806  | T=0.0234/51 | chr4 3162034 C T   | nonsynonymous | chr4 | 94       | NP | P  | Np | NP | NP | P  | Yes      | Confirmed. Present  |
| Patient   | TG   | rs114944116 | T=0.0023/5  | chr8 133919047 G T | nonsynonymous | chr8 | 6        | P  | P  | P  | P  | P  | NP | Unlikely | Not performed       |
| Father    | TG   | rs114944116 | T=0.0023/5  | chr8 133919047 G T | nonsynonymous | chr8 | 28       | P  | P  | P  | P  | P  | NP | Unlikely | Not performed       |
| Patient   | TG   | rs150728539 | NA          | chr8 133920582 C G | nonsynonymous | chr8 | 21       | P  | NP | P  | P  | NP | NP | Unlikely | Not performed       |
| Mother    | TG   | rs150728539 | NA          | chr8 133920582 C G | nonsynonymous | chr8 | 9        | P  | NP | P  | P  | NP | NP | Unlikely | Not performed       |

**Table S1.4\* - Variants found by WES in patient 3.**

| denovo             |          |             |             |                     |               |       |          | Functional impact prediction |           |          |        |      |          |                         | Sanger confirmation                      |
|--------------------|----------|-------------|-------------|---------------------|---------------|-------|----------|------------------------------|-----------|----------|--------|------|----------|-------------------------|------------------------------------------|
| sample_id          | gene     | snp135      | freq        | SNP_id              | class         | chr   | coverage | SIFT                         | PolyPhen2 | MutAsse. | Condel | Pmut | MutTast. | Nervous system function |                                          |
| Patient            | CCDC73   |             |             | chr11 32636452 A G  | nonsynonymous | chr11 | 23       | P                            | NP        | NP       | NP     | NP   | NP       | No info                 | Confirmed. Not <i>de novo</i> (maternal) |
| Patient            | PPP1R32  |             |             | chr11 61254529 A G  | nonsynonymous | chr11 | 21       | NP                           | NP        | NP       | NP     | NP   | NP       | Yes                     | Confirmed. Not <i>de novo</i> (maternal) |
| Patient            | SYNE1    | rs150179494 | A=0.0014/3  | chr6 152665271 G A  | nonsynonymous | chr6  | 27       | P                            | P         | NP       | NP     | NP   | NP       | Yes                     | Confirmed. Not <i>de novo</i> (paternal) |
| Patient            | HSDL1    |             |             | chr16 84163608 C T  | nonsynonymous | chr16 | 745      | NP                           | NP        | NP       | NP     | NP   | NP       | Unlikely                | Not performed                            |
| Patient            | ATG10    |             |             | chr5 81354416 A G   | nonsynonymous | chr5  | 23       | NP                           | NP        | NP       | NP     | NP   | NP       | Yes                     | Not performed                            |
| recessive_compound |          |             |             |                     |               |       |          |                              |           |          |        |      |          |                         |                                          |
| sample_id          | gene     | snp135      | freq        | SNP_id              | class         | chr   | coverage |                              |           |          |        |      |          |                         | Sanger confirmation                      |
| Patient            | HMCN1    | rs140061598 | C=0.0014/2  | chr1 185956606 T C  | nonsynonymous | chr1  | 53       |                              |           |          |        |      |          |                         | Not performed                            |
| Mother             | HMCN1    | rs140061598 | C=0.0014/2  | chr1 185956606 T C  | nonsynonymous | chr1  | 52       |                              |           |          |        |      |          |                         | Not performed                            |
| Patient            | HMCN1    | rs76748242  | A=0.0087/19 | chr1 186031730 C A  | nonsynonymous | chr1  | 60       |                              |           |          |        |      |          |                         | Not performed                            |
| Father             | HMCN1    | rs76748242  | A=0.0087/19 | chr1 186031730 C A  | nonsynonymous | chr1  | 60       |                              |           |          |        |      |          |                         | Not performed                            |
| Patient            | CKAP5    | rs145146116 | C=0.0005/1  | chr1 46817323 T C   | nonsynonymous | chr11 | 31       |                              |           |          |        |      |          |                         | Not performed                            |
| Father             | CKAP5    | rs145146116 | C=0.0005/1  | chr1 46817323 T C   | nonsynonymous | chr11 | 29       |                              |           |          |        |      |          |                         | Not performed                            |
| Patient            | CKAP5    | rs138443179 | T=0.0064/14 | chr1 46837930 C T   | nonsynonymous | chr11 | 66       |                              |           |          |        |      |          |                         | Not performed                            |
| Mother             | CKAP5    | rs138443179 | T=0.0064/14 | chr1 46837930 C T   | nonsynonymous | chr11 | 74       |                              |           |          |        |      |          |                         | Not performed                            |
| Patient            | AHNAK2   | rs116553680 | T=0.0087/19 | chr14 105406201 C T | nonsynonymous | chr14 | 75       |                              |           |          |        |      |          |                         | Not performed                            |
| Mother             | AHNAK2   | rs116553680 | T=0.0087/19 | chr14 105406201 C T | nonsynonymous | chr14 | 96       |                              |           |          |        |      |          |                         | Not performed                            |
| Patient            | AHNAK2   | rs144504264 | C=0.0114/25 | chr14 105419755 G C | nonsynonymous | chr14 | 15       |                              |           |          |        |      |          |                         | Not performed                            |
| Father             | AHNAK2   | rs144504264 | C=0.0114/25 | chr14 105419755 G C | nonsynonymous | chr14 | 15       |                              |           |          |        |      |          |                         | Not performed                            |
| Patient            | TRMT61B  | rs144501479 | NA          | chr2 29073096 T G   | nonsynonymous | chr2  | 26       |                              |           |          |        |      |          |                         | Not performed                            |
| Mother             | TRMT61B  | rs144501479 | NA          | chr2 29073096 T G   | nonsynonymous | chr2  | 28       |                              |           |          |        |      |          |                         | Not performed                            |
| Patient            | TRMT61B  | rs146318990 | A=0.0055/12 | chr2 29092933 G A   | nonsynonymous | chr2  | 46       |                              |           |          |        |      |          |                         | Not performed                            |
| Father             | TRMT61B  | rs146318990 | A=0.0055/12 | chr2 29092933 G A   | nonsynonymous | chr2  | 57       |                              |           |          |        |      |          |                         | Not performed                            |
| Patient            | DNAH1    |             |             | chr3 52366284 C A   | nonsynonymous | chr3  | 39       |                              |           |          |        |      |          |                         | Not performed                            |
| Father             | DNAH1    |             |             | chr3 52366284 C A   | nonsynonymous | chr3  | 55       |                              |           |          |        |      |          |                         | Not performed                            |
| Patient            | DNAH1    | rs147123898 | C=0.0046/10 | chr3 52400812 A C   | nonsynonymous | chr3  | 23       |                              |           |          |        |      |          |                         | Not performed                            |
| Mother             | DNAH1    | rs147123898 | C=0.0046/10 | chr3 52400812 A C   | nonsynonymous | chr3  | 24       |                              |           |          |        |      |          |                         | Not performed                            |
| Patient            | ARHGAP31 | rs751793    | T=0.0005/1  | chr3 119102053 C T  | nonsynonymous | chr3  | 138      |                              |           |          |        |      |          |                         | Not performed                            |
| Father             | ARHGAP31 | rs751793    | T=0.0005/1  | chr3 119102053 C T  | nonsynonymous | chr3  | 155      |                              |           |          |        |      |          |                         | Not performed                            |
| Patient            | ARHGAP31 | rs183837502 | C=0.0014/3  | chr3 119133106 T C  | nonsynonymous | chr3  | 36       |                              |           |          |        |      |          |                         | Not performed                            |
| Mother             | ARHGAP31 | rs183837502 | C=0.0014/3  | chr3 119133106 T C  | nonsynonymous | chr3  | 32       |                              |           |          |        |      |          |                         | Not performed                            |
| Patient            | SOX30    | rs889057    | T=0.0005/1  | chr5 157053365 C T  | nonsynonymous | chr5  | 71       |                              |           |          |        |      |          |                         | Not performed                            |
| Mother             | SOX30    | rs889057    | T=0.0005/1  | chr5 157053365 C T  | nonsynonymous | chr5  | 50       |                              |           |          |        |      |          |                         | Not performed                            |
| Patient            | SOX30    | rs75818287  | A=0.0055/12 | chr5 157065439 G A  | nonsynonymous | chr5  | 25       |                              |           |          |        |      |          |                         | Not performed                            |
| Father             | SOX30    | rs75818287  | A=0.0055/12 | chr5 157065439 G A  | nonsynonymous | chr5  | 23       |                              |           |          |        |      |          |                         | Not performed                            |
| Patient            | GIF      | rs35867471  | C=0.0174/38 | chr11 59604754 T C  | nonsynonymous | chr11 | 88       |                              |           |          |        |      |          |                         | Not performed                            |
| Father             | GIF      | rs35867471  | C=0.0174/38 | chr11 59604754 T C  | nonsynonymous | chr11 | 69       |                              |           |          |        |      |          |                         | Not performed                            |
| Patient            | GIF      | rs11825834  | T=0.0041/8  | chr11 59611415 C T  | nonsynonymous | chr11 | 135      |                              |           |          |        |      |          |                         | Not performed                            |

|         |         |             |             |                     |               |       |     |  |  |  |  |  |  |  |  |  |               |
|---------|---------|-------------|-------------|---------------------|---------------|-------|-----|--|--|--|--|--|--|--|--|--|---------------|
| Mother  | GIF     | rs11825834  | T=0.0041/8  | chr11 59611415 C T  | nonsynonymous | chr11 | 145 |  |  |  |  |  |  |  |  |  | Not performed |
| Patient | TLL5    | rs141614130 | A=0.0005/1  | chr14 76165549 G A  | nonsynonymous | chr14 | 17  |  |  |  |  |  |  |  |  |  | Not performed |
| Father  | TLL5    | rs141614130 | A=0.0005/1  | chr14 76165549 G A  | nonsynonymous | chr14 | 25  |  |  |  |  |  |  |  |  |  | Not performed |
| Patient | TLL5    | rs11848004  | A=0.0101/21 | chr14 76232470 G A  | nonsynonymous | chr14 | 22  |  |  |  |  |  |  |  |  |  | Not performed |
| Mother  | TLL5    | rs11848004  | A=0.0101/21 | chr14 76232470 G A  | nonsynonymous | chr14 | 29  |  |  |  |  |  |  |  |  |  | Not performed |
| Patient | TNFAIP2 | rs137885091 | NA          | chr14 103599106 C T | nonsynonymous | chr14 | 45  |  |  |  |  |  |  |  |  |  | Not performed |
| Mother  | TNFAIP2 | rs137885091 | NA          | chr14 103599106 C T | nonsynonymous | chr14 | 52  |  |  |  |  |  |  |  |  |  | Not performed |
| Patient | TNFAIP2 | rs2229727   | T=0.0266/57 | chr14 103599847 C T | nonsynonymous | chr14 | 15  |  |  |  |  |  |  |  |  |  | Not performed |
| Father  | TNFAIP2 | rs2229727   | T=0.0266/57 | chr14 103599847 C T | nonsynonymous | chr14 | 11  |  |  |  |  |  |  |  |  |  | Not performed |
| Patient | CCDC135 | rs116668060 | A=0.0087/19 | chr16 57738918 G A  | nonsynonymous | chr16 | 72  |  |  |  |  |  |  |  |  |  | Not performed |
| Father  | CCDC135 | rs116668060 | A=0.0087/19 | chr16 57738918 G A  | nonsynonymous | chr16 | 81  |  |  |  |  |  |  |  |  |  | Not performed |
| Patient | CCDC135 | rs147667972 | NA          | chr16 57761251 C T  | nonsynonymous | chr16 | 24  |  |  |  |  |  |  |  |  |  | Not performed |
| Mother  | CCDC135 | rs147667972 | NA          | chr16 57761251 C T  | nonsynonymous | chr16 | 26  |  |  |  |  |  |  |  |  |  | Not performed |
| Patient | UIMC1   | rs10475633  | T=0.0289/62 | chr5 176335585 C T  | nonsynonymous | chr5  | 25  |  |  |  |  |  |  |  |  |  | Not performed |
| Father  | UIMC1   | rs10475633  | T=0.0289/62 | chr5 176335585 C T  | nonsynonymous | chr5  | 34  |  |  |  |  |  |  |  |  |  | Not performed |
| Patient | UIMC1   | rs199580368 | C=0.0005/1  | chr5 176396261 A C  | nonsynonymous | chr5  | 172 |  |  |  |  |  |  |  |  |  | Not performed |
| Mother  | UIMC1   | rs199580368 | C=0.0005/1  | chr5 176396261 A C  | nonsynonymous | chr5  | 127 |  |  |  |  |  |  |  |  |  | Not performed |
| Patient | ETV7    |             |             | chr6 36322447 A T   | nonsynonymous | chr6  | 13  |  |  |  |  |  |  |  |  |  | Not performed |
| Father  | ETV7    |             |             | chr6 36322447 A T   | nonsynonymous | chr6  | 23  |  |  |  |  |  |  |  |  |  | Not performed |
| Patient | ETV7    | rs34306145  | T=0.0087/19 | chr6 36339176 C T   | nonsynonymous | chr6  | 21  |  |  |  |  |  |  |  |  |  | Not performed |
| Mother  | ETV7    | rs34306145  | T=0.0087/19 | chr6 36339176 C T   | nonsynonymous | chr6  | 32  |  |  |  |  |  |  |  |  |  | Not performed |
| Patient | VWDE    | rs116125922 | A=0.0092/20 | chr7 12381687 G A   | nonsynonymous | chr7  | 27  |  |  |  |  |  |  |  |  |  | Not performed |
| Father  | VWDE    | rs116125922 | A=0.0092/20 | chr7 12381687 G A   | nonsynonymous | chr7  | 24  |  |  |  |  |  |  |  |  |  | Not performed |
| Patient | VWDE    | rs17165872  | A=0.0344/75 | chr7 12384089 C A   | nonsynonymous | chr7  | 29  |  |  |  |  |  |  |  |  |  | Not performed |
| Mother  | VWDE    | rs17165872  | A=0.0344/75 | chr7 12384089 C A   | nonsynonymous | chr7  | 39  |  |  |  |  |  |  |  |  |  | Not performed |
| Patient | CSMD1   | rs199914130 | NA          | chr8 2966208 G A    | nonsynonymous | chr8  | 72  |  |  |  |  |  |  |  |  |  | Not performed |
| Father  | CSMD1   | rs199914130 | NA          | chr8 2966208 G A    | nonsynonymous | chr8  | 75  |  |  |  |  |  |  |  |  |  | Not performed |
| Patient | CSMD1   | rs115021133 | G=0.0106/22 | chr8 3226864 C G    | nonsynonymous | chr8  | 31  |  |  |  |  |  |  |  |  |  | Not performed |
| Mother  | CSMD1   | rs115021133 | G=0.0106/22 | chr8 3226864 C G    | nonsynonymous | chr8  | 27  |  |  |  |  |  |  |  |  |  | Not performed |

\*Not a Caucasian patient (both parents are Angolan)

**Table S1.5 – Variants found by WES in patient 4.**

| denovo    |         |        |      |                    |               |      |          | Functional impact prediction |           |          |        |      |          | Nervous system function | Sanger confirmation       |
|-----------|---------|--------|------|--------------------|---------------|------|----------|------------------------------|-----------|----------|--------|------|----------|-------------------------|---------------------------|
| sample_id | gene    | snp135 | freq | SNP_id             | class         | chr  | coverage | SIFT                         | PolyPhen2 | MutAsse. | Condel | Pmut | MutTast. |                         |                           |
| Patient   | SMARCA1 |        |      | chrX 128599594 C A | nonsynonymous | chrX | 42       | P                            | P         | P        | P      | P    | P        | Yes                     | Confirmed. <i>De novo</i> |
| Patient   | OR5V1   |        |      | chr6 29323941 T A  | nonsynonymous | chr6 | 17       | P                            | P         | P        | P      | P    | NP       | No Info                 | Not performed             |

  

| recessive_homozyg |        |             |            |                    |               |       |          |   |   |    |   |    |    |         |                     |
|-------------------|--------|-------------|------------|--------------------|---------------|-------|----------|---|---|----|---|----|----|---------|---------------------|
| sample_id         | gene   | snp135      | freq       | SNP_id             | class         | chr   | coverage |   |   |    |   |    |    |         | Sanger confirmation |
| Patient           | OR11H4 | rs140555973 | C=0.0005/1 | chr14 20711688 A C | nonsynonymous | chr14 | 67       | P | P | P  | P | NP | NP | Yes     | Not performed       |
| Mother            | OR11H4 | rs140555973 | C=0.0005/1 | chr14 20711688 A C | nonsynonymous | chr14 | 75       | P | P | P  | P | NP | NP | Yes     | Not performed       |
| Father            | OR11H4 | rs140555973 | C=0.0005/1 | chr14 20711688 A C | nonsynonymous | chr14 | 39       | P | P | P  | P | NP | NP | Yes     | Not performed       |
| Patient           | UNKL   | rs61741579  | T=0.0027/6 | chr16 1442911 C T  | nonsynonymous | chr16 | 154      | P | P | NP | P | NP | NP | No Info | Not performed       |
| Mother            | UNKL   | rs61741579  | T=0.0027/6 | chr16 1442911 C T  | nonsynonymous | chr16 | 166      | P | P | NP | P | NP | NP | No Info | Not performed       |
| Father            | UNKL   | rs61741579  | T=0.0027/6 | chr16 1442911 C T  | nonsynonymous | chr16 | 75       | P | P | NP | P | NP | NP | No Info | Not performed       |

**Table S1.6 – Variants found by WES in patient 5.**

| denovo    |         |        |      |                    |          |      |          | Functional impact prediction |           |          |        |      |          | Nervous system function | Sanger confirmation       |
|-----------|---------|--------|------|--------------------|----------|------|----------|------------------------------|-----------|----------|--------|------|----------|-------------------------|---------------------------|
| sample_id | Gene    | snp135 | freq | SNP_id             | class    | chr  | coverage | SIFT                         | PolyPhen2 | MutAsse. | Condel | Pmut | MutTast. |                         |                           |
| Patient   | ZNF238  |        |      | chr1 244217659 C T | stopgain | chr1 | 12       | P                            | P         | -        | -      | P    | P        | Yes                     | Confirmed. <i>De novo</i> |
| Patient   | S100BPB |        |      | chr1 33295564 G A  | splicing | chr1 | 19       | -                            | -         | -        | -      | -    | -        | No Info                 | Not performed             |

**Table S1.7 – Variants found by WES in patient 6.**

| denovo    |         |        |      |                    |               |       |          | Functional impact prediction |           |          |        |      |          | Nervous system function | Sanger confirmation                      |
|-----------|---------|--------|------|--------------------|---------------|-------|----------|------------------------------|-----------|----------|--------|------|----------|-------------------------|------------------------------------------|
| sample_id | gene    | snp135 | freq | SNP_id             | class         | chr   | coverage | SIFT                         | PolyPhen2 | MutAssc. | Condel | Pmut | MutTast. |                         |                                          |
| Patient   | PLEKHG6 |        |      | chr12 6436851 C/T  | nonsynonymous | chr12 | 14       | NP                           | NP        | NP       | NP     | NP   | NP       | Unknown                 | Confirmed. Not <i>de novo</i> (paternal) |
| Patient   | LARP4   |        |      | chr12 50867915 A/G | nonsynonymous | chr12 | 76       | P                            | NP        | NP       | NP     | NP   | NP       | Unknown                 | Confirmed. <i>De novo</i>                |
| Patient   | NEK9    |        |      | chr14 75570699 A/C | nonsynonymous | chr14 | 34       | P                            | NP        | NP       | P      | P    | P        | No                      | Not performed                            |
| Patient   | AP3B1   |        |      | chr5 77385269 A/C  | nonsynonymous | chr5  | 23       | P                            | NP        | NP       | P      | P    | P        | Yes                     | Not performed                            |

**Table S1.8 – Variants found by WES in patient 8.**

| denovo          |        |             |            |                    |               |       |          | Functional impact prediction |           |          |        |      |          | Nervous system function | Sanger confirmation          |
|-----------------|--------|-------------|------------|--------------------|---------------|-------|----------|------------------------------|-----------|----------|--------|------|----------|-------------------------|------------------------------|
| sample_id       | gene   | snp135      | freq       | SNP_id             | class         | chr   | coverage | SIFT                         | PolyPhen2 | MutAssc. | Condel | Pmut | MutTast. |                         |                              |
| Patient         | MOCOS  |             |            | chr18 33775244 G/A | nonsynonymous | chr18 | 18       | P                            | P         | P        | P      | P    | P        | No                      | Not performed                |
| recessive_homoz |        |             |            |                    |               |       |          |                              |           |          |        |      |          |                         |                              |
| sample_id       | gene   | snp135      | freq       | SNP_id             | class         | chr   | coverage |                              |           |          |        |      |          |                         | Sanger confirmation          |
| Patient         | EIF2B2 | rs150617429 | T=0.0023/5 | chr14 75470349 C/T | nonsynonymous | chr14 | 63       | NP                           | NP        | NP       | NP     | NP   | P        | Yes                     | Confirmed. In homozygosity   |
| Mother          | EIF2B2 | rs150617429 | T=0.0023/5 | chr14 75470349 C/T | nonsynonymous | chr14 | 69       | NP                           | NP        | NP       | NP     | NP   | P        | Yes                     | Confirmed. In heterozygosity |
| Father          | EIF2B2 | rs150617429 | T=0.0023/5 | chr14 75470349 C/T | nonsynonymous | chr14 | 67       | NP                           | NP        | NP       | NP     | NP   | P        | Yes                     | Confirmed. In heterozygosity |

**Table S1.9 – Variants found by WES in patient 9.**

| denovo             |          |             |             |                     |               |       |          | Functional impact prediction |           |          |        |      |          | Nervous system function | Sanger confirmation                      |
|--------------------|----------|-------------|-------------|---------------------|---------------|-------|----------|------------------------------|-----------|----------|--------|------|----------|-------------------------|------------------------------------------|
| sample_id          | gene     | snp135      | freq        | SNP_id              | class         | chr   | coverage | SIFT                         | PolyPhen2 | MutAsse. | Condel | Pmut | MutTast. |                         |                                          |
| Patient            | RCC2     |             |             | chr1 17736540 C T   | nonsynonymous | chr1  | 8        | P                            | P         | P        | P      | P    | P        | Yes                     | Confirmed. Not <i>de novo</i> (maternal) |
| Patient            | GABBR2   |             |             | chr9 101133817 C T  | nonsynonymous | chr9  | 7        | P                            | NP        | P        | NP     | NP   | P        | Yes                     | Confirmed. <i>De novo</i>                |
| Patient            | H2AFY2   | rs149708840 | T=0.0037/8  | chr10 71871347 G T  | nonsynonymous | chr10 | 25       | NP                           | NP        | NP       | NP     | NP   | NP       | Yes                     | Not performed                            |
| Patient            | C10orf96 |             |             | chr10 118084833 G C | nonsynonymous | chr10 | 15       | P                            | P         | P        | NP     | P    | NP       | No Info                 | Not performed                            |
| Patient            | NCF4     |             |             | chr22 37271932 A C  | nonsynonymous | chr22 | 29       | P                            | NP        | -        | P      | NP   | NP       | No Info                 | Not performed                            |
| Patient            | FYCO1    | rs114145679 | T=0.0064/14 | chr3 46009810 C T   | nonsynonymous | chr3  | 18       | NP                           | NP        | -        | -      | NP   | NP       | Yes                     | Not performed                            |
| recessive compound |          |             |             |                     |               |       |          |                              |           |          |        |      |          |                         |                                          |
| sample_id          | gene     | snp135      |             | SNP_id              | class         | chr   | coverage |                              |           |          |        |      |          |                         | Confirmação por Sanger                   |
| Patient            | TTN      |             |             | chr2 179414062 G T  | nonsynonymous | chr2  | 108      | -                            | -         | -        | -      | -    | NP       | No Info                 | Not performed                            |
| Father             | TTN      |             |             | chr2 179414062 G T  | nonsynonymous | chr2  | 145      | -                            | -         | -        | -      | -    | NP       | No Info                 | Not performed                            |
| Patient            | TTN      | rs34819099  | T=0.005/11  | chr2 179628918 C T  | nonsynonymous | chr2  | 27       | NP                           | NP        | -        | -      | -    | P        | No Info                 | Not performed                            |
| Mother             | TTN      | rs34819099  | T=0.005/11  | chr2 179628918 C T  | nonsynonymous | chr2  | 25       | NP                           | NP        | -        | -      | -    | P        | No Info                 | Not performed                            |

**Table S1.10 – Variants found by WES in patient 10.**

| denovo    |          |             |            |                    |               |       |          | Functional impact prediction |           |          |        |      |          | Nervous system function | Sanger confirmation                      |
|-----------|----------|-------------|------------|--------------------|---------------|-------|----------|------------------------------|-----------|----------|--------|------|----------|-------------------------|------------------------------------------|
| sample_id | gene     | snp135      | freq       | SNP_id             | class         | chr   | coverage | SIFT                         | PolyPhen2 | MutAsse. | Condel | Pmut | MutTast. |                         |                                          |
| Patient   | MAGEL2   |             |            | chr15 23889919 C T | nonsynonymous | chr15 | 27       | -                            | -         | -        | -      | -    | -        | Yes                     | Performed. Not <i>de novo</i> (paternal) |
| Patient   | RPGRIP1L |             |            | chr16 53636037 T C | nonsynonymous | chr16 | 4        | NP                           | NP        | NP       | NP     | P    | NP       | Yes                     | Performed. Not <i>de novo</i> (paternal) |
| Patient   | TMEM18   |             |            | chr2 669832 C G    | nonsynonymous | chr2  | 18       | P                            | P         | P        | P      | NP   | P        | Yes                     | Performed. Not <i>de novo</i> (maternal) |
| Patient   | MAST4    | rs115056755 | T=0.0018/4 | chr5 66461954 C T  | nonsynonymous | chr5  | 6        | NP                           | NP        | NP       | NP     | NP   | NP       | Yes                     | Performed. Not <i>de novo</i> (maternal) |
| Patient   | TMCC3    |             |            | chr12 94976229 G A | nonsynonymous | chr12 | 29       | NP                           | NP        | NP       | NP     | NP   | P        | No Info                 | Not performed                            |

**Table S1.11 – Variants found by WES in patient 11.**

| denovo          |         |            |            |                     |               |       |          | Functional impact prediction |           |          |        |      |          | Nervous system function | Sanger confirmation                      |
|-----------------|---------|------------|------------|---------------------|---------------|-------|----------|------------------------------|-----------|----------|--------|------|----------|-------------------------|------------------------------------------|
| sample_id       | gene    | snp135     | freq       | SNP_id              | class         | chr   | coverage | SIFT                         | PolyPhen2 | MutAsse. | Condel | Pmut | MutTast. |                         |                                          |
| Patient         | LAMB2   |            |            | chr3 49160344 C T   | nonsynonymous | chr3  | 7        | P                            | P         | NP       | P      | NP   | P        | Yes                     | Confirmed. <i>Not de novo</i> (maternal) |
| Patient         | RHOBTB2 |            |            | chr8 22865220 A G   | nonsynonymous | chr8  | 70       | P                            | P         | NP       | P      | NP   | NP       | Yes                     | Confirmed. <i>De novo</i>                |
| Patient         | MARCH8  |            |            | chr10 46028610 A G  | nonsynonymous | chr10 | 35       | NP                           | NP        | NP       | NP     | NP   | NP       | Unknown                 | Not performed                            |
| Patient         | TTC40   |            |            | chr10 134736171 G A | nonsynonymous | chr10 | 18       | P                            | -         | -        | -      | -    | -        | No Info                 | Not performed                            |
| Patient         | TAS2R30 |            |            | chr12 11286282 G A  | nonsynonymous | chr12 | 40       | -                            | -         | NP       | NP     | NP   | -        | No Info                 | Not performed                            |
| Patient         | CIITA   |            |            | chr16 11001853 T C  | nonsynonymous | chr16 | 21       | P                            | P         | NP       | P      | P    | P        | Unknown                 | Not performed                            |
| Patient         | ALPPL2  |            |            | chr2 233273068 T G  | nonsynonymous | chr2  | 46       | NP                           | NP        | NP       | NP     | NP   | NP       | Unknown                 | Not performed                            |
| Patient         | BCR     |            |            | chr22 23615846 G A  | nonsynonymous | chr22 | 14       | NP                           | NP        | NP       | NP     | NP   | P        | Unknown                 | Not performed                            |
| Patient         | SLC36A2 |            |            | chr5 150696620 C T  | nonsynonymous | chr5  | 19       | P                            | P         | NP       | NP     | NP   | P        | Unknown                 | Not performed                            |
| Patient         | TINAG   |            |            | chr6 54186172 A G   | nonsynonymous | chr6  | 38       | NP                           | NP        | NP       | NP     | NP   | NP       | Unknown                 | Not performed                            |
| recessive_homoz |         |            |            |                     |               |       |          |                              |           |          |        |      |          |                         |                                          |
| sample_id       | gene    | snp135     | freq       | SNP_id              | class         | chr   | coverage |                              |           |          |        |      |          |                         | Sanger confirmation                      |
| Patient         | EIF4G1  | rs34838305 | T=0.0005/1 | chr3 184038482 G A  | nonsynonymous | chr3  | 55       | P                            | P         | NP       | P      | NP   | P        | Yes                     | Confirmed. In homozygosity               |
| Mother          | EIF4G1  | rs34838305 | T=0.0005/1 | chr3 184038482 G A  | nonsynonymous | chr3  | 60       | P                            | P         | NP       | P      | NP   | P        | Yes                     | Confirmed. In heterozygosity             |
| Father          | EIF4G1  | rs34838305 | T=0.0005/1 | chr3 184038482 G A  | nonsynonymous | chr3  | 61       | P                            | P         | NP       | P      | NP   | P        | Yes                     | Confirmed. In heterozygosity             |

**Table S1.12 – Variants found by WES in patient 12.**

| denovo    |        |            |            |                    |               |       |          | Functional impact prediction |           |          |        |      |          | Nervous system function | Sanger confirmation                      |
|-----------|--------|------------|------------|--------------------|---------------|-------|----------|------------------------------|-----------|----------|--------|------|----------|-------------------------|------------------------------------------|
| sample_id | gene   | snp135     | freq       | SNP_id             | class         | chr   | coverage | SIFT                         | PolyPhen2 | MutAsse. | Condel | Pmut | MutTast. |                         |                                          |
| Patient   | EEF1A2 |            |            | chr20 62120361 T G | nonsynonymous | chr20 | 21       | P                            | P         | P        | P      | P    | P        | Yes                     | Confirmed. <i>Not de novo</i> (maternal) |
| Patient   | DNAH1  | rs61734653 | G=0.005/11 | chr3 52381865 A G  | nonsynonymous | chr3  | 11       | NP                           | NP        | NP       | NP     | NP   | NP       | Yes                     | Confirmed. <i>Not de novo</i> (maternal) |
| Patient   | PRDM5  |            |            | chr4 121739655 G A | nonsynonymous | chr4  | 57       | NP                           | NP        | NP       | NP     | NP   | NP       | Yes                     | Not performed                            |



**Tables S1.13 – Variants found by WES in patient 13.**

| denovo             |         |             |             |                     |               |       |          | Functional impact prediction |           |          |        |      |          | Nervous system function | Sanger confirmation                      |
|--------------------|---------|-------------|-------------|---------------------|---------------|-------|----------|------------------------------|-----------|----------|--------|------|----------|-------------------------|------------------------------------------|
| sample_id          | gene    | snp135      | freq        | SNP_id              | class         | chr   | coverage | SIFT                         | PolyPhen2 | MutAsse. | Condel | Pmut | MutTast. |                         |                                          |
| Patient            | RRAS2   |             |             | chr11 14317388 G A  | nonsynonymous | chr11 | 20       | P                            | NP        | NP       | NP     | NP   | P        | Yes                     | Confirmed. Not <i>de novo</i> (maternal) |
| Patient            | BNIP2   | rs142043306 | NA          | chr15 59961478 A G  | nonsynonymous | chr15 | 11       | P                            | P         | -        | P      | NP   | P        | Yes                     | Confirmed. Not <i>de novo</i> (paternal) |
| Patient            | MTERFD3 |             |             | chr12 107371889 C T | nonsynonymous | chr12 | 17       | P                            | NP        | NP       | NP     | NP   | P        | Unknown                 | Not performed                            |
| Patient            | ENAM    |             |             | chr4 71508671 C A   | nonsynonymous | chr4  | 31       | P                            | P         | P        | NP     | NP   | NP       | Unknown                 | Not performed                            |
| recessive_homoz    |         |             |             |                     |               |       |          |                              |           |          |        |      |          |                         |                                          |
| sample_id          | gene    | snp135      | freq        | SNP_id              | class         | chr   | coverage |                              |           |          |        |      |          |                         | Sanger confirmation                      |
| Patient            | PSMD1   |             |             | chr2 231948329 A G  | nonsynonymous | chr2  | 45       | NP                           | NP        | NP       | NP     | NP   | NP       | No Info                 | Confirmed. Present in homozygosity       |
| Mother             | PSMD1   |             |             | chr2 231948329 A G  | nonsynonymous | chr2  | 67       | NP                           | NP        | NP       | NP     | NP   | NP       | No Info                 | Confirmed. Present in heterozygosity     |
| Father             | PSMD1   |             |             | chr2 231948329 A G  | nonsynonymous | chr2  | 87       | NP                           | NP        | NP       | NP     | NP   | NP       | No Info                 | Confirmed. Present in heterozygosity     |
| Patient            | CBR1    | rs146758729 | A=0.0005/1  | chr21 37444929 G A  | nonsynonymous | chr21 | 14       | NP                           | NP        | NP       | NP     | P    | P        | Yes                     | Not performed                            |
| Mother             | CBR1    | rs146758729 | A=0.0005/1  | chr21 37444929 G A  | nonsynonymous | chr21 | 31       | NP                           | NP        | NP       | NP     | P    | P        | Yes                     | Not performed                            |
| Father             | CBR1    | rs146758729 | A=0.0005/1  | chr21 37444929 G A  | nonsynonymous | chr21 | 42       | NP                           | NP        | NP       | NP     | P    | P        | Yes                     | Not performed                            |
| recessive_compound |         |             |             |                     |               |       |          |                              |           |          |        |      |          |                         |                                          |
| sample_id          | gene    | snp135      | freq        | SNP_id              | class         | chr   | coverage |                              |           |          |        |      |          |                         | Sanger confirmation                      |
| Patient            | TCTN2   | rs145374149 | T=0.0009/2  | chr12 124171486 C T | nonsynonymous | chr12 | 56       | NP                           | NP        | NP       | NP     | NP   | NP       | Yes                     | Not performed                            |
| Mother             | TCTN2   | rs145374149 | T=0.0009/2  | chr12 124171486 C T | nonsynonymous | chr12 | 99       | NP                           | NP        | NP       | NP     | NP   | NP       | Yes                     | Not performed                            |
| Patient            | TCTN2   |             |             | chr12 124184283 T C | nonsynonymous | chr12 | 51       | NP                           | NP        | NP       | NP     | P    | NP       | Yes                     | Not performed                            |
| Father             | TCTN2   |             |             | chr12 124184283 T C | nonsynonymous | chr12 | 114      | NP                           | NP        | NP       | NP     | P    | NP       | Yes                     | Not performed                            |
| Patient            | PLCH1   | rs150381264 | T=0.0018/4  | chr3 155199598 C T  | nonsynonymous | chr3  | 41       | NP                           | NP        | NP       | NP     | NP   | NP       | Yes                     | Not performed                            |
| Mother             | PLCH1   | rs150381264 | T=0.0018/4  | chr3 155199598 C T  | nonsynonymous | chr3  | 65       | NP                           | NP        | NP       | NP     | NP   | NP       | Yes                     | Not performed                            |
| Patient            | PLCH1   | rs150143990 | A=0.0046/10 | chr3 155314114 G A  | nonsynonymous | chr3  | 17       | NP                           | NP        | NP       | P      | P    | NP       | Yes                     | Not performed                            |
| Father             | PLCH1   | rs150143990 | A=0.0046/10 | chr3 155314114 G A  | nonsynonymous | chr3  | 50       | NP                           | NP        | NP       | P      | P    | NP       | Yes                     | Not performed                            |

**Table S1.14 – Variants found by WES in patient 14.**

| denovo             |         |             |             |                    |               |       |          | Functional impact prediction |           |          |        |      |          | Nervous system function | Sanger confirmation       |
|--------------------|---------|-------------|-------------|--------------------|---------------|-------|----------|------------------------------|-----------|----------|--------|------|----------|-------------------------|---------------------------|
| sample_id          | gene    | snp135      | freq        | SNP_id             | class         | chr   | coverage | SIFT                         | PolyPhen2 | MutAssc. | Condel | Pmut | MutTast. |                         |                           |
| Patient            | STXBP1  |             |             | chr9 130425592 T C | nonsynonymous | chr9  | 83       | P                            | P         | P        | P      | P    | P        | Yes                     | Confirmed, <i>De novo</i> |
| recessive compound |         |             |             |                    |               |       |          |                              |           |          |        |      |          |                         |                           |
| sample_id          | gene    | snp135      | freq        | SNP_id             | class         | chr   | coverage |                              |           |          |        |      |          |                         | Sanger confirmation       |
| Patient            | HPX     | rs150488733 | NA          | chr11 6452695 G A  | nonsynonymous | chr11 | 56       | P                            | P         | NP       | P      | P    | P        | Yes                     | Not performed             |
| Father             | HPX     | rs150488733 | NA          | chr11 6452695 G A  | nonsynonymous | chr11 | 77       | P                            | P         | NP       | P      | P    | P        | Yes                     | Not performed             |
| Patient            | HPX     |             |             | chr11 6459640 C A  | nonsynonymous | chr11 | 68       | P                            | NP        | P        | P      | NP   | P        | Yes                     | Not performed             |
| Mother             | HPX     |             |             | chr11 6459640 C A  | nonsynonymous | chr11 | 63       | P                            | NP        | P        | P      | NP   | P        | Yes                     | Not performed             |
| Patient            | HSD17B8 |             |             | chr6 33172705 G C  | nonsynonymous | chr6  | 12       | P                            | NP        | NP       | NP     | NP   | P        | Yes                     | Not performed             |
| Mother             | HSD17B8 |             |             | chr6 33172705 G C  | nonsynonymous | chr6  | 5        | P                            | NP        | NP       | NP     | NP   | P        | Yes                     | Not performed             |
| Patient            | HSD17B8 | rs116381506 | T=0.0046/10 | chr6 33173457 C T  | nonsynonymous | chr6  | 338      | P                            | P         | P        | P      | P    | P        | Yes                     | Not performed             |
| Father             | HSD17B8 | rs116381506 | T=0.0046/10 | chr6 33173457 C T  | nonsynonymous | chr6  | 319      | P                            | P         | P        | P      | P    | P        | Yes                     | Not performed             |
| xlinked            |         |             |             |                    |               |       |          |                              |           |          |        |      |          |                         |                           |
| sample_id          | gene    | snp135      | freq        | SNP_id             | class         | chr   | coverage |                              |           |          |        |      |          |                         | Sanger confirmation       |
| Patient            | GPR64   |             |             | chrX 19024128 C A  | nonsynonymous | chrX  | 8        | P                            | NP        | -        | -      | NP   | NP       | Yes                     | Not performed             |
| Mother             | GPR64   |             |             | chrX 19024128 C A  | nonsynonymous | chrX  | 9        | P                            | NP        | -        | -      | NP   | NP       | Yes                     | Not performed             |
| Patient            | FAM48B2 |             |             | chrX 24329737 C A  | nonsynonymous | chrX  | 5        | -                            | -         | -        | -      | P    | -        | No info                 | Not performed             |
| Mother             | FAM48B2 |             |             | chrX 24329737 C A  | nonsynonymous | chrX  | 16       | -                            | -         | -        | -      | P    | -        | No info                 | Not performed             |

**Table S1.15 – Variants found by WES in patient 15.**

| denovo             |         |             |            |                    |               |      |          | Functional impact prediction |           |         |        |      |          | Nervous system function | Sanger confirmation                      |
|--------------------|---------|-------------|------------|--------------------|---------------|------|----------|------------------------------|-----------|---------|--------|------|----------|-------------------------|------------------------------------------|
| sample_id          | gene    | snp135      | freq       | SNP_id             | class         | chr  | coverage | SIFT                         | PolyPhen2 | MutAss. | Condel | Pmut | MutTast. |                         |                                          |
| Patient            | CHPF    |             |            | chr2 220404347 C G | nonsynonymous | chr2 | 16       | NP                           | NP        | NP      | NP     | NP   | NP       | Yes                     | Confirmed. Not <i>de novo</i> (paternal) |
| Patient            | ZDBF2   |             |            | chr2 207172196 A G | nonsynonymous | chr2 | 53       | P                            | P         | NP      | P      | P    | NP       | Unknown                 | Not performed                            |
| recessive_compound |         |             |            |                    |               |      |          |                              |           |         |        |      |          |                         |                                          |
| sample_id          | gene    | snp135      | freq       | SNP_id             | class         | chr  | coverage |                              |           |         |        |      |          |                         | Confirmação por Sanger                   |
| Patient            | CAGE1   | rs45437691  | A=0.0005/1 | chr6 7378978 G A   | nonsynonymous | chr6 | 74       | NP                           | -         | -       | -      | NP   | NP       | Unknown                 | Not performed                            |
| Father             | CAGE1   | rs45437691  | A=0.0005/1 | chr6 7378978 G A   | nonsynonymous | chr6 | 81       | NP                           | -         | -       | -      | NP   | NP       | Unknown                 | Not performed                            |
| Patient            | CAGE1   | rs183206380 | A=0.0009/2 | chr6 7379149 C A   | nonsynonymous | chr6 | 71       | NP                           | -         | -       | NP     | NP   | NP       | Unknown                 | Not performed                            |
| Mother             | CAGE1   | rs183206380 | A=0.0009/2 | chr6 7379149 C A   | nonsynonymous | chr6 | 47       | NP                           | -         | -       | NP     | NP   | NP       | Unknown                 | Not performed                            |
| xlinked            |         |             |            |                    |               |      |          |                              |           |         |        |      |          |                         |                                          |
| sample_id          | gene    | snp135      | freq       | SNP_id             | class         | chr  | coverage |                              |           |         |        |      |          |                         | Confirmação por Sanger                   |
| Patient            | SLC35A2 |             |            | chrX 48762414 C T  | nonsynonymous | chrX | 12       | P                            | P         | NP      | P      | NP   | P        | Yes                     | Confirmed. Maternal (X-linked)           |
| Mother             | SLC35A2 |             |            | chrX 48762414 C T  | nonsynonymous | chrX | 19       | P                            | P         | NP      | P      | NP   | P        | Yes                     | Confirmed. In heterozygosity             |

**Table S1.16 – Variants found by WES in patient 17.**

| denovo             |         |        |      |                    |               |       |          | Functional impact prediction |           |          |        |      |          | Nervous system function | Sanger confirmation       |
|--------------------|---------|--------|------|--------------------|---------------|-------|----------|------------------------------|-----------|----------|--------|------|----------|-------------------------|---------------------------|
| sample_id          | gene    | snp135 | freq | SNP_id             | class         | chr   | coverage | SIFT                         | PolyPhen2 | MutAsse. | Condel | Pmut | MutTast. |                         |                           |
| Patient            | DDX23   |        |      | chr12 49230558 G A | nonsynonymous | chr12 | 120      | P                            | P         | P        | P      | P    | P        | Unknown                 | Confirmed. <i>De novo</i> |
| Patient            | EEF1A2  |        |      | chr20 62127259 C T | nonsynonymous | chr20 | 37       | P                            | P         | NP       | P      | NP   | P        | Yes                     | Confirmed. <i>De novo</i> |
| Patient            | LIN9    |        |      | chr1 226475489 C T | nonsynonymous | chr1  | 20       | P                            | NP        | NP       | NP     | NP   | NP       | Unknwon                 | Not performed             |
| Patient            | L3MBTL3 |        |      | chr6 130460830 G C | nonsynonymous | chr6  | 29       | P                            | P         | P        | P      | P    | P        | Unknwon                 | Not performed             |
| recessive_compound |         |        |      |                    |               |       |          |                              |           |          |        |      |          |                         |                           |
| sample_id          | gene    | snp135 | freq | SNP_id             | class         | chr   | coverage |                              |           |          |        |      |          |                         | Sanger confirmation       |
| Patient            | AHNAK   |        |      | chr11 62290815 A G | nonsynonymous | chr11 | 115      | P                            | P         | NP       | P      | P    | NP       | Yes                     | Not performed             |
| Father             | AHNAK   |        |      | chr11 62290815 A G | nonsynonymous | chr11 | 117      | P                            | P         | NP       | P      | P    | NP       | Yes                     | Not performed             |
| Patient            | AHNAK   |        |      | chr11 62298843 G A | nonsynonymous | chr11 | 124      | P                            | NP        | NP       | NP     | NP   | NP       | Yes                     | Not performed             |
| Mother             | AHNAK   |        |      | chr11 62298843 G A | nonsynonymous | chr11 | 120      | P                            | NP        | NP       | NP     | NP   | NP       | Yes                     | Not performed             |

**Table S1.17 – Variants found by WES in patient 18.**

| denovo    |       |        |      |                     |               |       |          | Functional impact prediction |           |          |        |      |          | Nervous system function | Sanger confirmation                      |
|-----------|-------|--------|------|---------------------|---------------|-------|----------|------------------------------|-----------|----------|--------|------|----------|-------------------------|------------------------------------------|
| sample_id | gene  | snp135 | freq | SNP_id              | class         | chr   | coverage | SIFT                         | PolyPhen2 | MutAsse. | Condel | Pmut | MutTast. |                         |                                          |
| Patient   | ASPM  |        |      | chr1 197097663 C T  | nonsynonymous | chr1  | 13       | NP                           | NP        | NP       | NP     | NP   | P        | Yes                     | Confirmed. <i>Not de novo</i> (maternal) |
| Patient   | CHD8  |        |      | chr14 21873449 C A  | nonsynonymous | chr14 | 35       | P                            | NP        | NP       | NP     | NP   | P        | Yes                     | Confirmed. <i>Not de novo</i> (maternal) |
| Patient   | LMOD1 |        |      | chr1 201915453 T C  | nonsynonymous | chr1  | 85       | P                            | P         | NP       | NP     | NP   | NP       | Unknown                 | Not performed                            |
| Patient   | LAMP1 |        |      | chr13 113975974 C T | nonsynonymous | chr13 | 60       | NP                           | NP        | NP       | NP     | NP   | NP       | Yes                     | Not performed                            |

**Table S1.18 – Variants found by WES in patient 19.**

| denovo    |         |             |            |                   |               |      |          | Functional impact prediction |           |          |        |      |          | Nervous system function | Sanger confirmation            |
|-----------|---------|-------------|------------|-------------------|---------------|------|----------|------------------------------|-----------|----------|--------|------|----------|-------------------------|--------------------------------|
| sample_id | gene    | snp135      | freq       | SNP_id            | class         | chr  | coverage | SIFT                         | PolyPhen2 | MutAsse. | Condel | Pmut | MutTast. |                         |                                |
| Patient   | SPRED2  |             |            | chr2 65659108 G T | nonsynonymous | chr2 | 17       | NP                           | NP        | NP       | NP     | P    | P        | Yes                     | Not performed                  |
| Patient   | SLC38A9 | rs35800744  | T=0.005/11 | chr5 54945091 C T | nonsynonymous | chr5 | 38       | NP                           | NP        | NP       | NP     | NP   | NP       | No Info                 | Not performed                  |
| Patient   | TTC37   |             |            | chr5 94856512 T A | nonsynonymous | chr5 | 15       | P                            | P         | P        | P      | NP   | P        | Unknown                 | Not performed                  |
| Patient   | DTNBP1  |             |            | chr6 15651554 A T | nonsynonymous | chr6 | 15       | P                            | NP        | NP       | NP     | NP   | P        | Yes                     | Not performed                  |
| xlinked   |         |             |            |                   |               |      |          |                              |           |          |        |      |          |                         |                                |
| sample_id | gene    | snp135      | freq       | SNP_id            | class         | chr  | coverage |                              |           |          |        |      |          |                         | Sanger confirmation            |
| Patient   | ZFX     | rs150375972 | A=0.0006/1 | chrX 24197650 G A | nonsynonymous | chrX | 41       | P                            | NP        | NP       | NP     | -    | NP       | Yes                     | Confirmed. Maternal (X-linked) |
| Mother    | ZFX     | rs150375972 | A=0.0006/1 | chrX 24197650 G A | nonsynonymous | chrX | 93       | P                            | NP        | NP       | NP     | -    | NP       | Yes                     | Confirmed. In heterozygosity   |
| Patient   | SHROOM4 | rs189694750 | A=0.003/5  | chrX 50378637 G A | nonsynonymous | chrX | 12       | P                            | P         | NP       | P      | P    | P        | Yes                     | Confirmed. Maternal (X-linked) |
| Mother    | SHROOM4 | rs189694750 | A=0.003/5  | chrX 50378637 G A | nonsynonymous | chrX | 27       | P                            | P         | NP       | P      | P    | P        | Yes                     | Confirmed. In heterozygosity   |
| Patient   | PHKA2   |             |            | chrX 18943832 G A | nonsynonymous | chrX | 11       | P                            | P         | P        | P      | P    | P        | No                      | Not performed                  |
| Mother    | PHKA2   |             |            | chrX 18943832 G A | nonsynonymous | chrX | 39       | P                            | P         | P        | P      | P    | P        | No                      | Not performed                  |
| Patient   | ACOT9   |             |            | chrX 23722015 G A | nonsynonymous | chrX | 17       | P                            | NP        | NP       | P      | P    | -        | Unknown                 | Not performed                  |
| Mother    | ACOT9   |             |            | chrX 23722015 G A | nonsynonymous | chrX | 70       | P                            | NP        | NP       | P      | P    | -        | Unknown                 | Not performed                  |
| Patient   | HDX     |             |            | chrX 83695581 G C | nonsynonymous | chrX | 30       | P                            | NP        | NP       | P      | NP   | P        | No Info                 | Not performed                  |
| Mother    | HDX     |             |            | chrX 83695581 G C | nonsynonymous | chrX | 47       | P                            | NP        | NP       | P      | NP   | P        | No Info                 | Not performed                  |

**Supplementary table S1.19 – Genes harboring variants submitted  
confirmation by to Sanger sequencing**

| <b>Trio</b> | <b>#Genes with variants<br/>selected for Sanger<br/>confirmation</b> | <b>Genes with variants selected for<br/>Sanger confirmation</b>          | <b>#Genes with variants<br/>confirmed by Sanger</b> | <b>Gene with variants confirmed by<br/>Sanger</b>                        |
|-------------|----------------------------------------------------------------------|--------------------------------------------------------------------------|-----------------------------------------------------|--------------------------------------------------------------------------|
| 1           | 5                                                                    | <i>PSIP1, TRAPPC6A, WASF2, PICALM,<br/>NXF1</i>                          | 5                                                   | <i>PSIP, TRAPPC6A, WASF2, PICALM,<br/>NXF1</i>                           |
| 2           | 4                                                                    | <i>FXR2, HTT, HEXDC, RIN2</i>                                            | 3                                                   | <i>HTT, HEXDC, RIN2</i>                                                  |
| 3           | 8                                                                    | <i>CCDC73, PPP1R32, GAL, EXOC3L4,<br/>CACNA1H, KATNB1, CELSR3, SYNE1</i> | 8                                                   | <i>CCDC73, PPP1R32, GAL, EXOC3L4,<br/>CACNA1H, KATNB1, CELSR3, SYNE1</i> |
| 4           | 1                                                                    | <i>SMARCA1</i>                                                           | 1                                                   | <i>SMARCA1</i>                                                           |
| 5           | 1                                                                    | <i>ZNF238</i>                                                            | 1                                                   | <i>ZNF238</i>                                                            |
| 6           | 2                                                                    | <i>PLEKHG6, LARP4</i>                                                    | 2                                                   | <i>PLEKHG6, LARP4</i>                                                    |
| 8           | 2                                                                    | <i>SLC26A4, EIF2B2</i>                                                   | 1                                                   | <i>EIF2B2</i>                                                            |
| 9           | 3                                                                    | <i>GABBR2, RCC2, ITGA7</i>                                               | 2                                                   | <i>GABBR2, RCC2</i>                                                      |
| 10          | 6                                                                    | <i>MAGEL2, DROSHA, TMEM18, DKK3,<br/>RPGRIPI1, MAST4</i>                 | 4                                                   | <i>MAGEL2, TMEM18, RPGRIPI1,<br/>MAST4</i>                               |
| 11          | 4                                                                    | <i>JMJD1C, RHOBTB2, LAMB2, EIF4G1</i>                                    | 3                                                   | <i>RHOBTB2, LAMB2, EIF4G1</i>                                            |
| 12          | 5                                                                    | <i>DDX23, EEF1A2, LEPROTL1,<br/>DNAH1, TCOF1</i>                         | 2                                                   | <i>EEF1A2, DNAH1</i>                                                     |
| 13          | 3                                                                    | <i>BNIP2, PSMD1, RRAS2</i>                                               | 3                                                   | <i>BNIP2, PSMD1, RRAS2</i>                                               |
| 14          | 1                                                                    | <i>STXBP1</i>                                                            | 1                                                   | <i>STXBP1</i>                                                            |
| 15          | 3                                                                    | <i>SLC35A2, KCNT2, CHPF</i>                                              | 2                                                   | <i>SLC35A2, CHPF</i>                                                     |
| 17          | 2                                                                    | <i>EEF1A2, DDX23</i>                                                     | 2                                                   | <i>EEF1A2, DDX23</i>                                                     |
| 18          | 3                                                                    | <i>CHD8, ASPM, CADPS2</i>                                                | 2                                                   | <i>CHD8, ASPM</i>                                                        |
| 19          | 3                                                                    | <i>SHROOM4, CACNA1G, ZFX</i>                                             | 2                                                   | <i>SHROOM4, ZFX</i>                                                      |

## **Part 2 - Detailed methodology**

### **Array comparative genomic hybridization analysis**

#### **Agilent 180K**

The aCGH analysis was performed on a human genome CGH Agilent 180K custom array designed by the Low Lands Consortium (LLC, Professor Klass Kok), specifically tailored for the study of children with ID/DD (AMADID:023363; Agilent, Santa Clara, CA). A total of 500 ng of DNA was labeled with Cy3 (test DNA) and Cy5 (reference DNA) using Klenow fragment at 37°C during 4 hours (<http://www.enzolifesciences.com/ENZ-42671/cgh-labeling-kit-for-oligo-arrays/>). The removal of uncoupled nucleotides was carried out in a MinElute PCR purification kit (Qiagen) according to the manufacturer's instructions

(<http://www.qiagen.com/Products/DnaCleanup/GelPcrSiCleanupSystems/MinEluteReactionCleanupKit.aspx?r=1644>). As reference DNA we used Kreatech's MegaPoll Reference DNA (Kreatech Diagnostics). Arrays were then hybridized using the Agilent SurePrint G3 Human CGH Microarray Kit. Briefly, samples and controls were hybridized in the presence of Cot-1 DNA and blocking agents for 24 hours, 65°C and 20rpm. After the hybridization period, the slides were washed and scanned with Agilent Microarray Scanner. Data was extracted with the Agilent Feature Extraction (FE) Software v10.5 using default settings for CGH hybridizations. Image analysis was performed using the across-array methodology described previously [47]. CGH data was analyzed using Nexus Copy Number 6.0 software with FASST2 Segmentation algorithm and a minimum of three probes in a region required to be considered a copy number alteration. The stipulated minimal thresholds for calling a copy number gain were 0.2 (Copy number

Gain) and 0.6 (High Copy Gain) and for calling a copy number loss were -0.2 (Copy number Loss) and -1 (Homozygous Copy Loss).

### **Illumina HumanOmniExpress**

The microarray analysis was performed on a Illumina HumanOmniExpress beadchip array (WG312-1120; Illumina, San Diego, CA). The array contained about 730,525 markers probes with a mean and median resolution of one probe every 4.0kb and 2.1kb, respectively. Samples were processed using the manufacturer's recommended assay: Infinium<sup>®</sup> HD assay. Using this protocol, around 750 ng each of DNA samples were denatured and neutralized to prepare them for amplification. The denatured DNA was isothermally amplified in an overnight incubation at 37°C. The amplified product was enzymatically fragmented to 300-600 base pairs, purified by isopropanol precipitation and later resuspended. Hybridization of sheared DNA to the bead chip was carried out in a capillary flow through chamber. Samples were pipetted into the BeadChip and incubated overnight at 48°C in the Illumina Hybridization Oven. Only the labeled probes are left on the beads. Green fluorescent Streptavidin and red fluorescent Anti-DNP Antibody are used to bind specifically to the labeled probes. The beads arrays are scanned using Illumina HiScan which has a laser that excites the fluorophore of the single-base extension product on the beads. The fluorescence intensity data generated is used to score genotype calls for each SNP. The scanned data are analyzed on Genome Analyzer software provided by Illumina, Inc.

CNVision [48], a pipeline developed for Illumina microarray data, was used to analyze CNVs using three algorithms with two different approaches: PennCNV [49], QuantiSNP [50] and GNOSIS [48]. GNOSIS is a distribution function algorithm that uses sliding windows to detect CNVs whereas PennCNV and QuantiSNP both implement a hidden



Markov model. All algorithms use logRatio (LRR; a measure of total signal intensity of probes) and B allele frequency (BAF; a measure of relative intensity ratio of allelic probes) information from the genotyping arrays to detect CNVs. Priority was given to CNVs with > 40kb (i.e., > 10 probes), rare (frequency<1% in DGV) and *de novo*, called by both QuantiSNP and PennCNV. Accuracy of CNVs detected *in silico* was assessed by visual inspection of LRR and BAF plots in GenomeStudio software, with its built-in algorithm - cnvPartition [51]. CNV interpretation took into consideration the size and number of genes, as well as presence of similar CNVs in databases such as ISCA [52] <https://www.iscaconsortium.org/> and DECIPHER [53] and information in OMIM and PubMed.

### **CNV interpretation**

Interpretation of the CNVs found was carried out based on the workflow proposed by [54]. For each patient the total number of CNVs was listed according to the position in the chromosome and classified according to the workflow represented in figure S2.1.

### **Quantitative PCR analysis**

Primers for quantitative PCR analysis (qPCR) were designed using Primer3Plus software [55] (listed in table 22) and taking into account standard recommendations for qPCR primer development. A set of primers were designed for the *TFC4* gene (ENSG00000196628). The reference genes used were *SDC4* (ENSG00000124145) and *ZNF80* (ENSG00000174255) localized in the 20q12-q13 and 3p12 regions, respectively (primers table S2.1). qPCR reactions were carried out in a 7500-FAST Real Time PCR machine (Applied Biosystems, Foster City, CA, USA) using Power SYBR Green® (Applied Biosystems) for a final volume of 20 µl, at the following amplifications conditions: denaturation for 10 minutes at 95°C, followed by 40 amplification cycles for

15 seconds at 60°C. The specificity of each of the reactions was verified by the generation of a melting curve for each of the amplified fragments. The primer efficiency was calculated by the generation of a standard curve fitting the accepted normal efficiency percentage. Quantification was performed as described elsewhere [56]. Ct values obtained for each test were analyzed in DataAssist™ software from Applied Biosystems.

## **Exome sequencing and data analysis**

### **Library preparation and SOLiD sequencing**

Exome enrichment was performed using 3 µg genomic DNA. DNA samples were sheared by sonication with the Covaris S2 instrument (Covaris, Inc.). Fragment libraries were constructed from the sheared samples using the AB Library Builder System (Life Technologies) and target enrichment was performed according to the manufacturer's protocols (Agilent SureSelect Human All Exon v4 kit). The Agilent SureSelect Human All Exon v4 kit was used for enrichment, containing exonic sequences of 20,965 genes (corresponding to a total of 334,378 exons), covering a total of 51Mb of genomic sequence (as specified by the company). Exome capture was conducted by hybridizing the DNA libraries with biotinylated RNA baits for 24 h followed by extraction using streptavidin coated magnetic beads. Captured DNA was then amplified followed by emulsion PCR using the EZ Bead System (Life Technologies) and sequenced on the SOLiD5500xl system, generating over 40 million reads of length 75bp for each of the samples. Individual libraries were labeled by a post-hybridization barcoding procedure (Agilent, Santa Clara, CA, USA; barcodes compatible with SOLiD sequencing technology).

## **Mapping and variant calling**

Alignment of color space reads to the human reference genome (hg19) was performed using v2.1 of the Lifescape Software (Life Technologies). Around 90% of the reads from each sample were uniquely mapped to the target regions, generating an average coverage of 35X and a median of 30x over the targeted exons across samples. Similar coverage has been described in other studies using a Agilent SureSelect human exome enrichment kit and SOLiD sequencing platform (Life Technologies) [57]. Single nucleotide variants (SNVs) and small insertions and deletions (indels) were subsequently called by the diBayes algorithm available within the Lifescape software. At least 10 reads are required to obtain a 99% probability that at least two reads contain the variant allele (assuming a binomial distribution with probability 0.5 of sequencing the variant allele at a heterozygous position. In our cohort, 80% of the targets were covered at least 10 fold (figure S2.2). Single Nucleotide Variants (SNVs) and indels were filtered as follows: exclusion of synonymous and common variants (MAF>1% dbSNP35, Exome Sequencing Project and 1000 genomes Project), variants present in the CanvasDB in-house exome database[58] in Uppsala (excluding individuals with neurodevelopmental phenotypes), presence of at least 3 unique variant reads (i.e. different start sites), as well as the variant being present in at least 15% of all reads. All called SNVs and indels were imported into a local installation of the CanvasDB database system [58] for annotation and further analysis of the variants.

## **Analysis pipeline**

To avoid false positives (i.e., variant calling in duplicate reads due to PCR artifacts), only variants present in reads with at least 3 different starts were used in downstream analysis. Then, we excluded intronic or synonymous variants. Next we filtered out variants present

in dbSNPv135 or in our in-house variant database. Our database contains variants from 500 in-house performed ‘exomes’ analyzed by the same pipeline. The inhouse database is composed of approximately 300 healthy individuals and 200 patients with non-neurodevelopmental disorders. Variants with frequency >1% in the 6500 individuals of the Exome Variant Server/National Heart, Lung and Blood Institute [59] or in the 1000 Genomes Project [60] were also excluded. This step further reduced the average number of variants (including stopgain, stoploss, missense, splicing, frameshift, in frame) to 26 per patient (which we called “private” variants).

### **Prioritization of candidate variants**

The exome data from both parents was used to provide the parent-of-origin of each candidate variant. Variants that were not identified in either parent with >15% variation reads were considered to be candidate *de novo* variants.

For the male patients the variants located at the X-chromosome and of maternal inheritance were classified as such, allowing an additional filter step for X-linked maternally-inherited variants. For recessive analysis, non-synonymous homozygous, non-synonymous compound heterozygous variants and/or canonical splice site variants in the same gene were selected for evaluation, with each parent being carrier of one of the variants.

Variants were selected for Sanger confirmation if (I) Integrative Genomics Viewer[61] visualization confirmed that the position where the variant occurred was sufficiently covered and matched the pre-defined inheritance model, (II) the variant occurred in a known or candidate ID gene or a gene known to be functionally relevant for the nervous system, (III) the effect of the variant on the gene was predicted to be deleterious. Gene prioritization took into consideration information on biological function available in the

literature (PubMed search) and in the OMIM, Gene Entrez, and GeneCards databases, genetic/protein interactions,[62] brain expression[63,64] and KO mice phenotype.[65]

We also took into consideration the type of variant and gave preference to loss of function variants (i.e., nonsense, splice site, frameshift) followed by missense and in frame variants. Guidance was also obtained from six prediction softwares, which was particularly helpful on evaluating missense variants. The prediction softwares and cutoffs used were: SIFT (damaging if SIFT score  $\leq 0.05$ ) [66], PolyPhen2 (damaging if PolyPhen2 score  $> 0.05$ ) [67], Mutation Assessor (damaging if Mutation assessor score  $> 1.938$ ) [68], Mutation Taster (damaging if Mutation taster classifies as disease causing) [69], PMut (damaging if Pmut score  $> 0.5$ ) [70], Condel (damaging if Condel classifies as deleterious) [71]. Conservation scores were also taken into account, namely: PhyloP (conserved if score  $> 0.95$  in a range between 0 and 1) [72], GERP (constrained if score ranges from 0 to 6.18) [73]. Finally, we compared the variants identified in our patients to variants in curated catalogs of pathogenic variants: Human Gene Mutation Database (HGMD) [74] and ClinVar [75]. A workflow for this analysis is represented in figure S2.3.

### **Prioritization of candidate genes**

Gene prioritization took into consideration (I) the biological function according to information available in the literature (PubMed search) [76] and in the Online Mendelian Inheritance in Man (OMIM) [77], Gene Entrez [78], and GeneCards [79] databases; (II) the genetic/protein interactions [80] (preference was given to genes that were on the same pathway or had co-expression, co-localization, physical or genetic interactions with *MECP2*, *CDKL5*, *FOXG1*); (III) brain expression [81,82] (preference was given to genes expressed in the brain); and (IV) KO mice phenotype [83] (preference was given to genes

for which KO mice had a neurological phenotype). A workflow for this analysis is represented in figure S2.4.

### **Sanger validation of selected candidate genes**

Validation of the selected candidate variants was performed using standard Sanger sequencing. Primers were designed to surround the candidate variant using Primer3Plus software [55] and PCR reactions were performed using MasterMix <sup>TM</sup> PCR reaction mix (Finnzymes, ©Thermo Fisher Scientific Inc) for a final volume of 20 µl, at the following amplification conditions: denaturation for 5 minutes at 95°C, followed by 30 amplification cycles (95°C for 1 minute, amplicon specific annealing temperature for 30 seconds, 72°C for 1 minute) and final extension for 10 minutes at 72°C. The products were sequenced in ABI 3730 XL equipment (Applied Biosystems, Life technologies, Carlsbad, CA). Of 56 candidate variants, 44 variants were confirmed by Sanger to be present (see supplementary table S20). Primer sequences are available in supplementary table S2.2.

### **Network analysis**

We performed gene network analysis to: I) verify if our list of candidate genes interacted amongst themselves and with the known RTT genes (*MECP2*, *CDKL5*, *FOXG1*), II) study the topology of these interactions, III) predict additional genes that may be involved in RTT if they are shown to interact with a large number of genes in the query set, IV) identify common biological themes by exploring functional enrichment analysis of Gene Ontology (GO) terms.

Network analysis was performed with GeneMANIA (version 3.1.2.7, <http://www.genemania.org/>).[80,84] Given a set of input genes, GeneMANIA finds related genes using a very large set of functional association data, including protein

interactions (two gene products are linked if they were found to interact in a protein-protein interaction study), genetic interactions (two genes are functionally associated if the effects of perturbing one gene perturb a second gene), pathway (two gene products are linked if they participate in the same reaction within a pathway), co-expression (two genes are linked if their expression levels are similar across conditions in a gene expression study), co-localization (two genes are linked if they are both expressed in the same tissue or if their gene products are both identified in the same cellular location), shared protein domain (two gene products are linked if they have the same protein domain) and predicted functional relationship (a major source of predicted data being known functional relationships from another organism via orthology). GeneMANIA also allows for functional enrichment analysis. Enrichment is calculated using as the foreground set all the genes in either the query list or the related genes discovered by GeneMANIA that have at least one GO annotation and as the background set all genes with GO annotations and at least one interaction in our GeneMANIA's database. For our analysis, we used GeneMANIA's default datasets for *Homo sapiens* (last dataset update June 1st 2014) and equal weighting by network. The genes used as input were the already known RTT genes (*MECP*, *CDKL5*, *FOXG1*) as well as the genes selected as likely causing RTT-like phenotype in our cohort. In the results generated by GeneMANIA we allowed for up to 20 related genes and at most 10 related attributes to be displayed.

## Supplementary figures

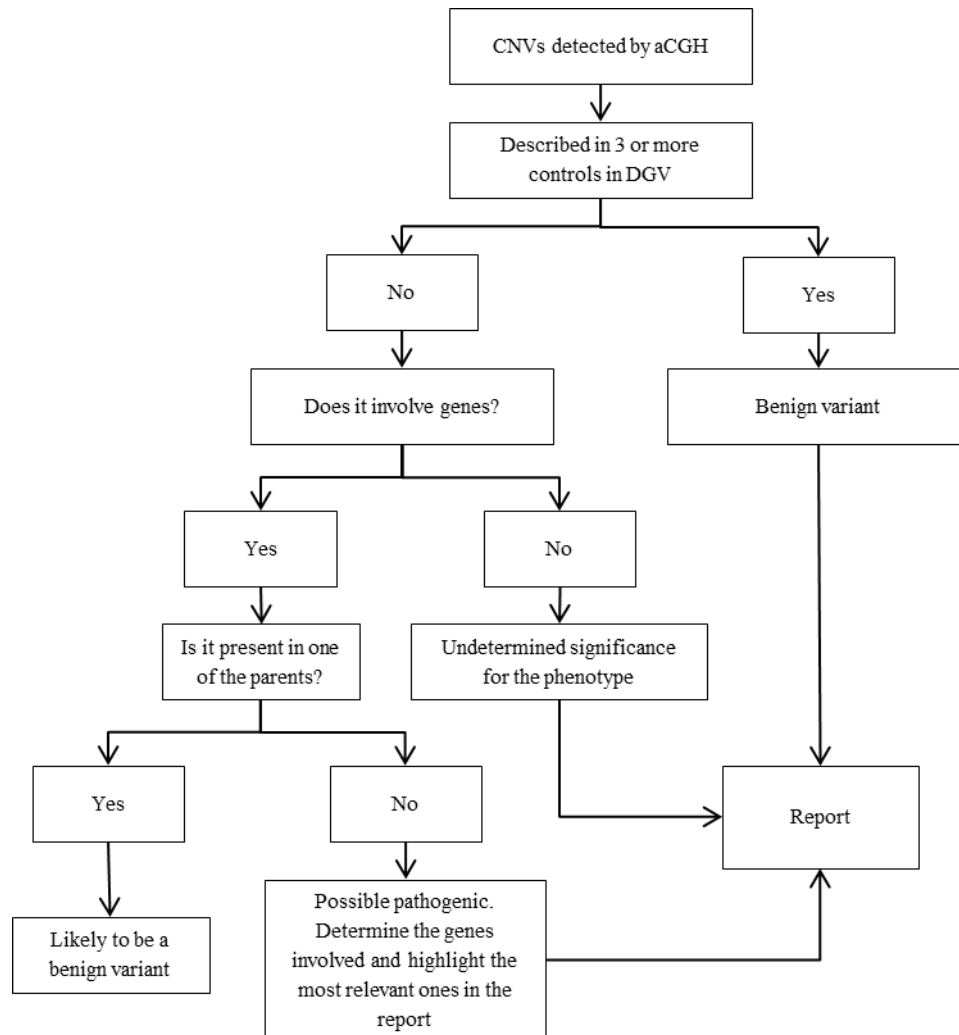

**Figure S2.1 – Schematic representation of the workflow followed for the interpretation of the CNVs found in each patient. (DGV: Database of Genomic Variants <http://dgv.tcag.ca/dgv/app/home> )**



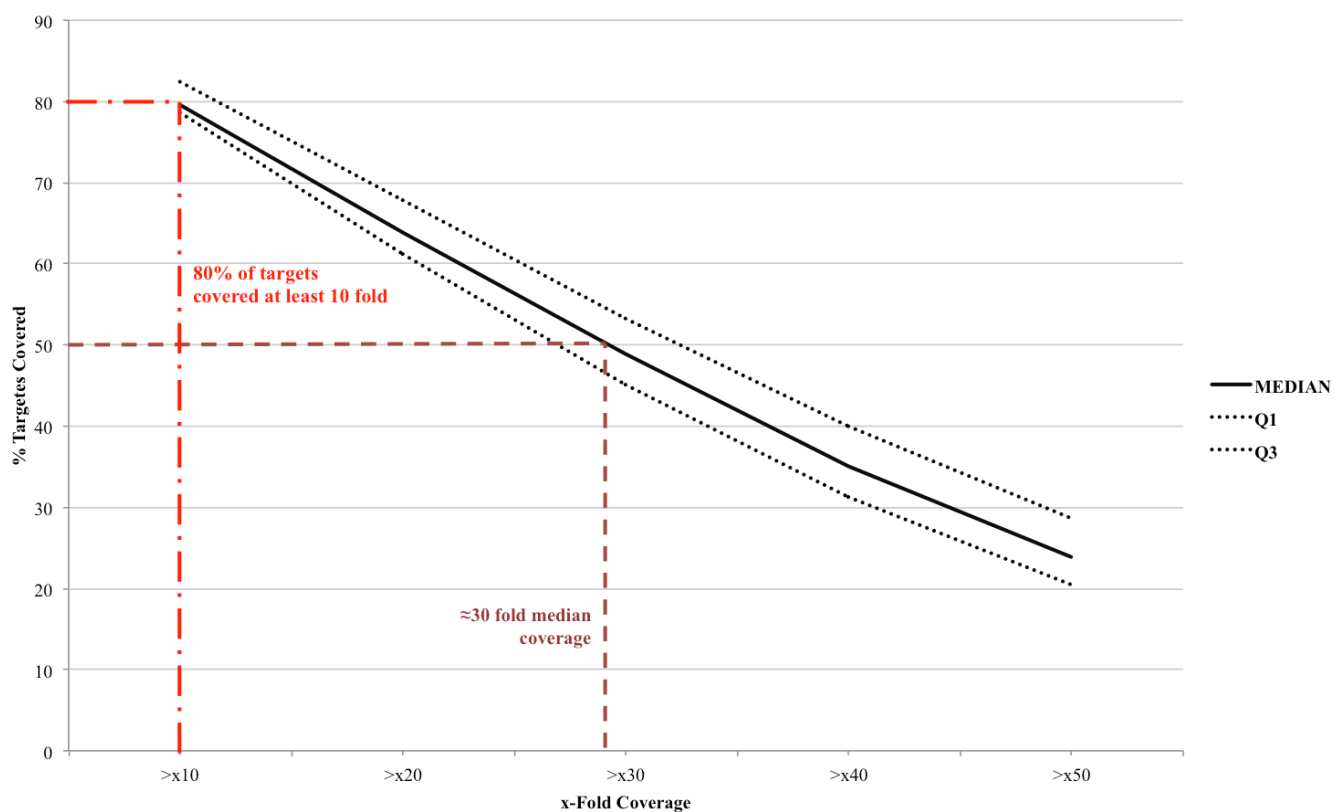

**Figure S2.2 – WES coverage distribution.** Coverage for all exons targeted by enrichment was evaluated. The median coverage across individuals was approximately 30 fold, with 80% of the targets covered at least 10 fold.

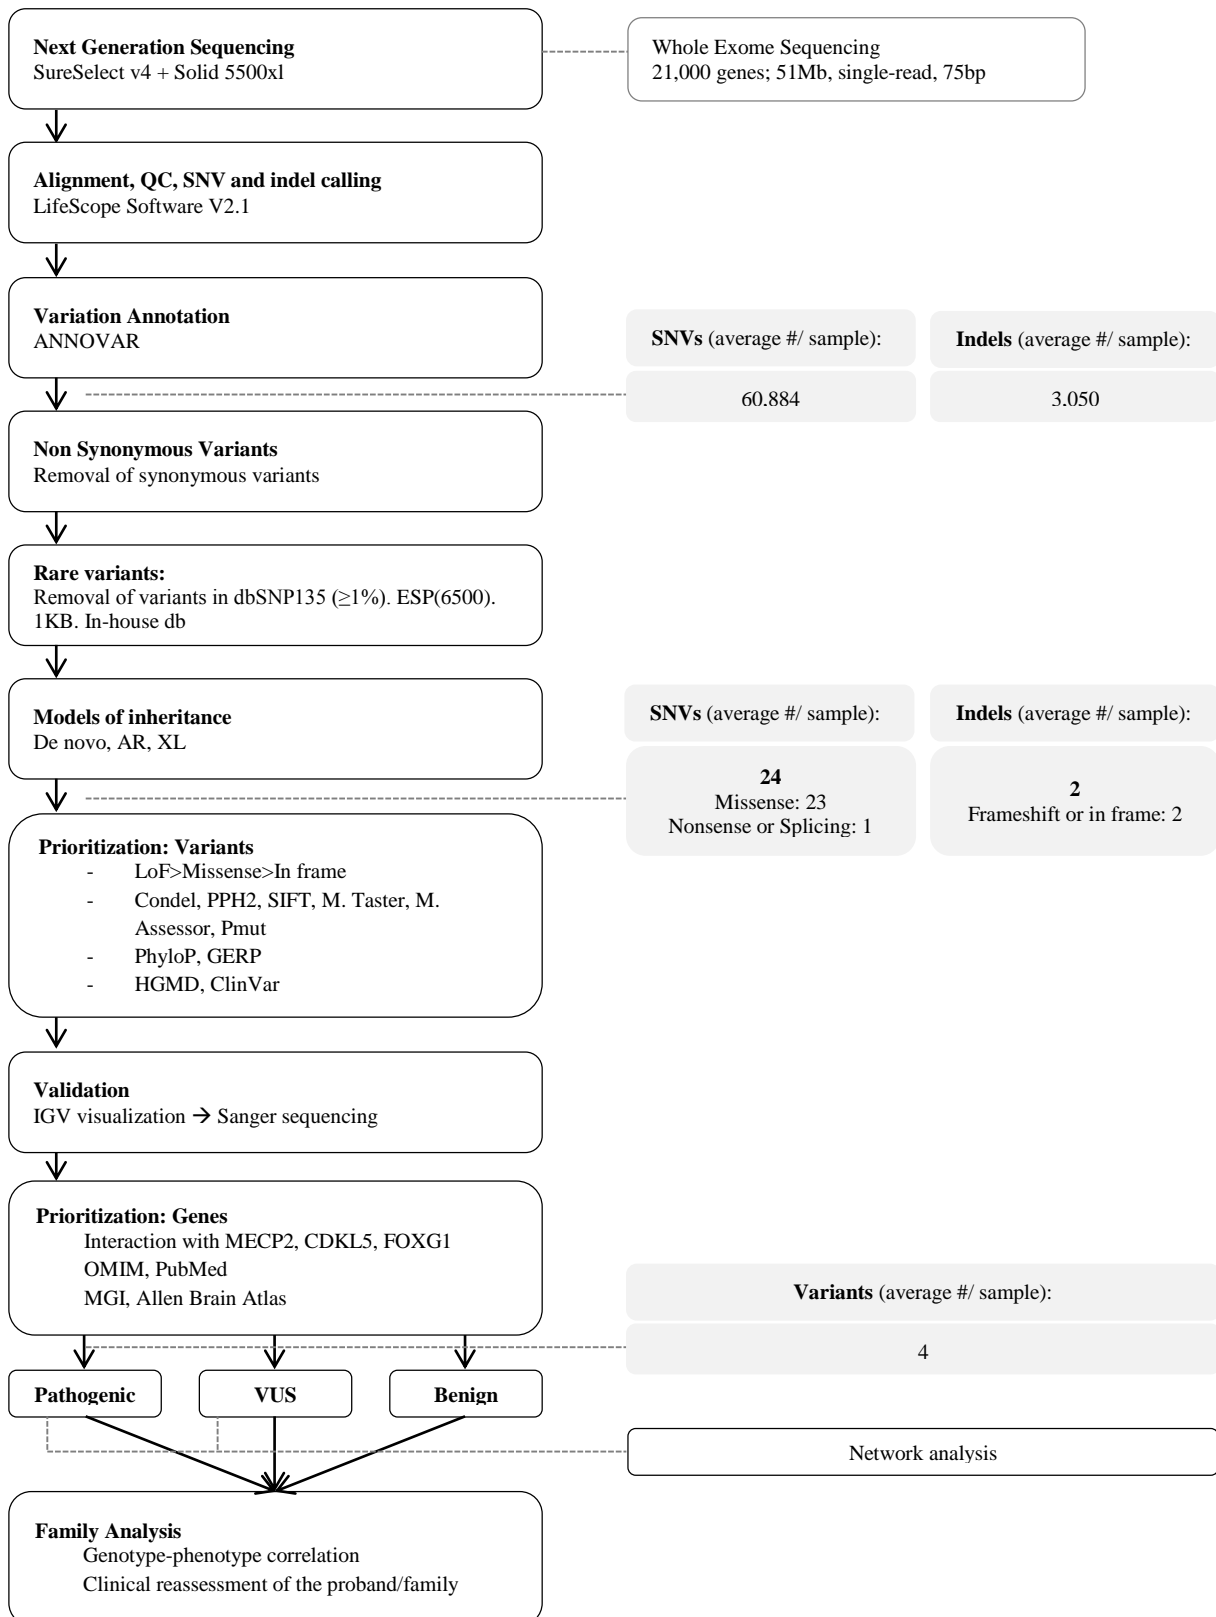

## **Exome sequencing and data analysis**

**Figure S2.3 - Overview of WES bioinformatic analysis pipeline.** Abbreviations: 1KG: 1000 genomes project; AR: autosomal recessive; ESP: Exome Sequencing Project; GERP: Genomic Evolutionary Rate Profiling; HGMD: Human Gene Mutation Database; IGV: Integrative Genomics Viewer; LoF: loss of function; M.ass: Mutation Assessor; M Taster: Mutation Taster; MGI: Mouse Genome Informatics; OMIM: Online Mendelian Inheritance in Man; PPH2: PolyPhen2; PhyloP: phylogenetic p-values; SIFT: Sorting Intolerant From Tolerant; VUS: Variants of Unknown Significance; XL: X-linked

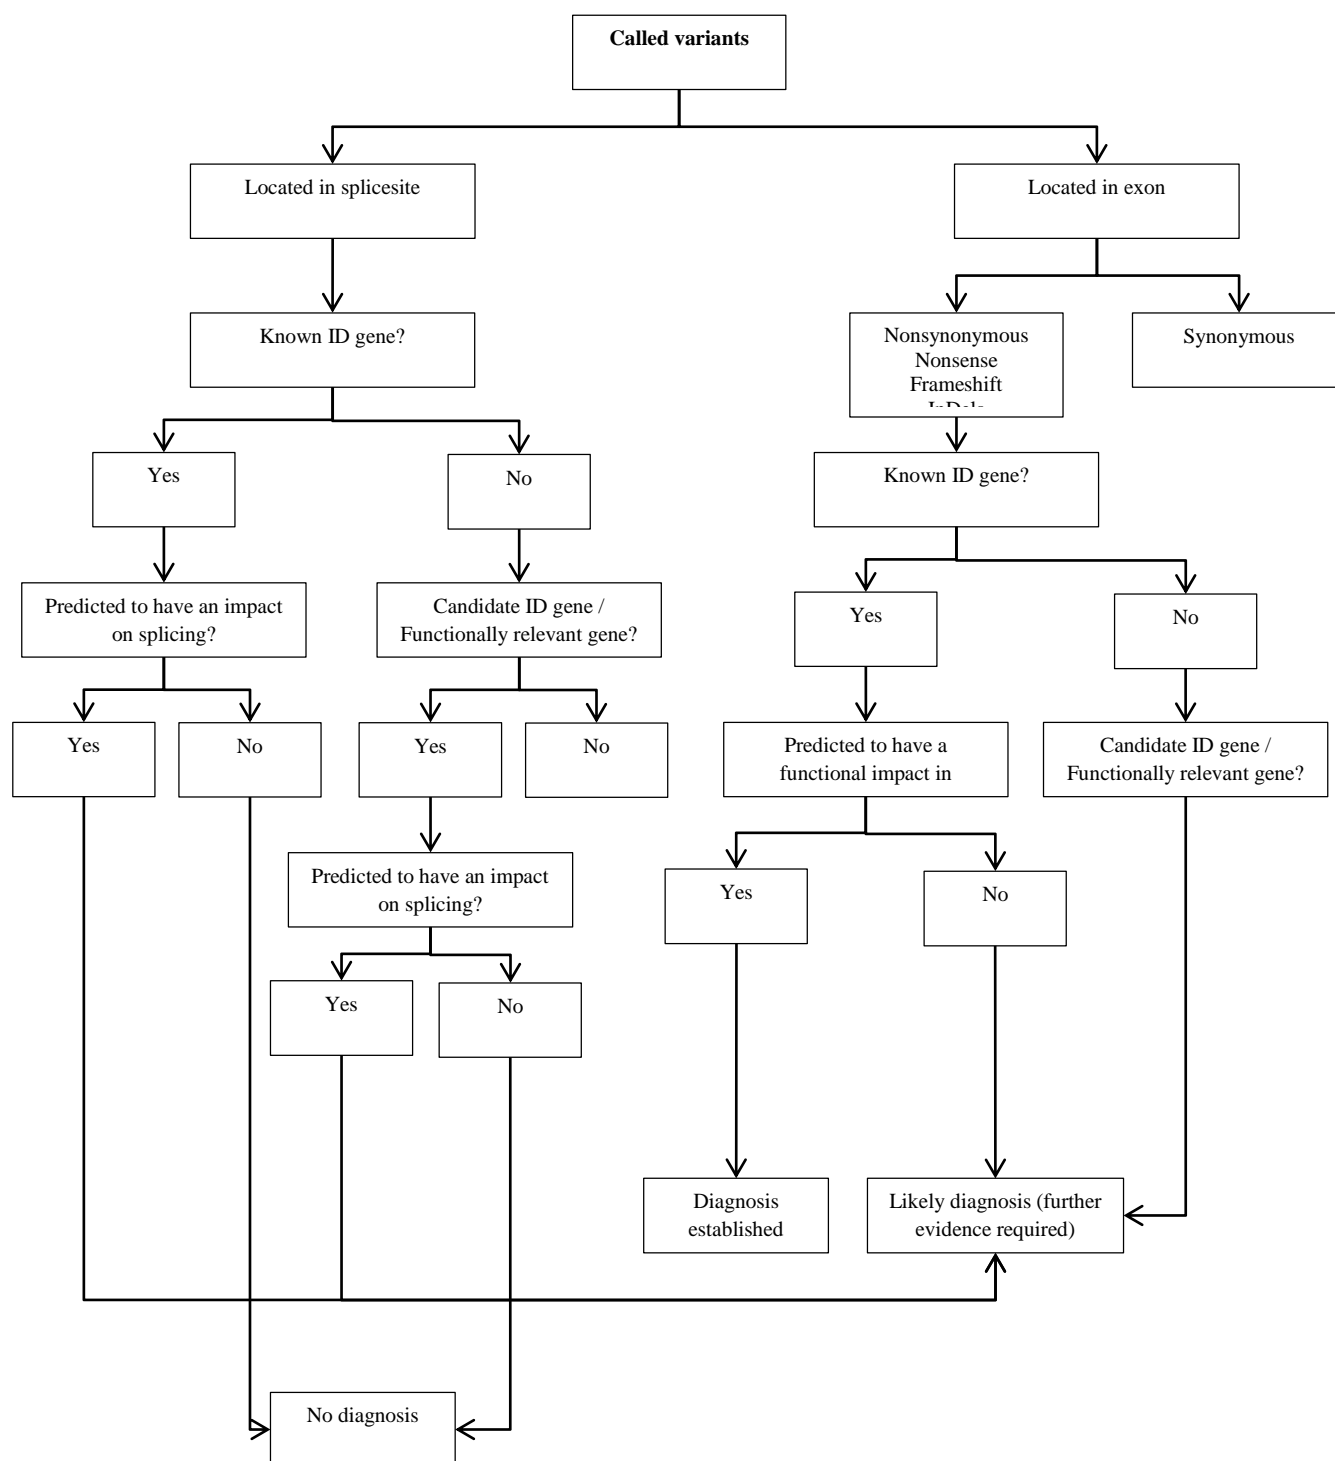

**Figure S2.4 – Classification of the variants detected by WES.** The workflow used to classify the variants called by WES is represented.

## Supplementary tables

### Supplementary table S2.1 – Primers used for quantitative PCR confirmation.

| Gene         | Primer Forward 5'→3' | Size (bp) | %GC | Tm (°C) | Primer Reverse 5'→3' | Size (bp) | %GC | Tm (°C) | Amplicon size (bp) |
|--------------|----------------------|-----------|-----|---------|----------------------|-----------|-----|---------|--------------------|
| <i>DRD3</i>  | CCATCTCACCATGCCTATCC | 20        | 55  | 60      | AAACAGAAGAGGGCAGGACA | 20        | 50  | 60      | 168                |
| <i>ZNF80</i> | GCTACCGCCAGATTCACACT | 20        | 55  | 60      | AATCTTCATGTGCCGGGTTA | 20        | 45  | 60      | 182                |
| <i>SDC4</i>  | ACCGAACCCAAGAACTAGA  | 20        | 45  | 56      | GTGCTGGACATTGACACCT  | 19        | 53  | 57      | 101                |

**Supplementary table S2.2 – Primers used for Sanger confirmation.**

| Gene                  | Primer Forward 5'→3'    | Size (bp) | %GC | Tm (°C) | Primer Reverse 5'→3'    | Size (bp) | %GC | Tm (°C) | Amplicon size (bp) |
|-----------------------|-------------------------|-----------|-----|---------|-------------------------|-----------|-----|---------|--------------------|
| <i>SLC35A2</i>        | AGATCCTCAAAGGCAGCTCA    | 20        | 50  | 60      | GACAACCACAGCCACCAGTA    | 20        | 55  | 60      | 203                |
| <i>KCNT2</i>          | TGAACTTCTAGGATCATTCAAGC | 24        | 37  | 59      | AATGCTGAATTCTTCTTTGG    | 22        | 36  | 58      | 250                |
| <i>CHPF</i>           | GACACTGGCCGCTTTGAT      | 18        | 55  | 60      | TCCTGTTCAAAGAGTAGCATGG  | 22        | 45  | 59      | 317                |
| <i>RHOBTB2</i>        | CTGTACACGGGGGAGCTAGA    | 20        | 60  | 60      | GCTGAGACAGACAGGCAATG    | 20        | 55  | 59      | 274                |
| <i>LAMB2</i>          | ATGCACCCTGTGCTACAAGC    | 20        | 55  | 61      | TGGAAGCATTAGCCTTGTC     | 20        | 50  | 60      | 261                |
| <i>JMJD1C</i>         | GAAATGGTGAGTTTCAGAAGGTT | 23        | 39  | 59      | CGTCGTGATGTAATGCCAAT    | 20        | 45  | 59      | 300                |
| <i>EIF4G1</i>         | TCCTGCTTCCCACTCATCTT    | 20        | 50  | 59      | ATCCAGGAAAGCAGGGAAAT    | 20        | 45  | 60      | 245                |
| <i>PLEKHG6</i>        | CCAACCTGGTCTGAGGAAGA    | 20        | 55  | 60      | CTCCCGGATCTCTCTGAGC     | 19        | 63  | 60      | 240                |
| <i>LARP4</i>          | TTCCTCTGTTTCTGAGGATGG   | 21        | 48  | 59      | CCAACCTGGGCTACTTCCAA    | 20        | 50  | 60      | 248                |
| <i>DDX23 (exon10)</i> | GCCCAGAGGCTCTACAGAAA    | 20        | 55  | 60      | TGTAGCCACACTTATCAATGACC | 23        | 44  | 59      | 291                |
| <i>EEF1A2 (exon3)</i> | TTCAAGTATGCCTGGGTGCT    | 20        | 50  | 61      | GAGCCAGACTGGGTGAGG      | 18        | 67  | 59      | 320                |

|                       |                           |    |    |    |                          |    |    |    |     |
|-----------------------|---------------------------|----|----|----|--------------------------|----|----|----|-----|
| <i>ASPM</i>           | CCTTTTGGCTTTTTCACGAG      | 20 | 45 | 60 | CATTGATGTACCACTTCCCTGA   | 22 | 45 | 60 | 329 |
| <i>CHD8</i>           | AAGCCAATGATGCTGAGAAGA     | 21 | 43 | 60 | AAGCATTCCCTCACCATTGA     | 20 | 45 | 60 | 246 |
| <i>CADPS2</i>         | TTTAATTGGGAAAAGAGTATTTTGA | 25 | 24 | 58 | CATCGAGAGGGGTTTAAATTG    | 21 | 43 | 59 | 300 |
| <i>DDX23 (exon15)</i> | AGTGTCATAGATGAGGGTTGG     | 22 | 45 | 58 | GAAAGGGTGAGACTTGAAAGGA   | 22 | 45 | 60 | 286 |
| <i>EEF1A2 (exon7)</i> | CAGGTCATCATCCTGAACCA      | 20 | 50 | 59 | CGGGTACTGGGAGAAGCTC      | 19 | 63 | 60 | 231 |
| <i>LEPROTL1</i>       | CGTTTTAGGGATTTTGTCTTC     | 21 | 38 | 58 | GGTAAGTGAACATTTCTCTGCATT | 24 | 38 | 59 | 300 |
| <i>DNAH1</i>          | GTCATAGCGCTGGCAGGA        | 18 | 61 | 61 | GCAGCACGTACCTTCTCCA      | 19 | 58 | 60 | 251 |
| <i>TCOF1</i>          | AGCTGCTGGAACAGGAAAGA      | 20 | 50 | 60 | AGGAATGAGACCAGGTGCTG     | 20 | 55 | 60 | 473 |
| <i>SLC26A4</i>        | AGAATTGATTGTGTGTGTGTGC    | 22 | 41 | 59 | TGTTTGTCAACCAAATAATGCTG  | 23 | 35 | 60 | 287 |
| <i>EIF2B2</i>         | TCCTCCCCACCTCTCTCTTT      | 20 | 55 | 60 | CCTGTGACCAGTCCCATTTT     | 20 | 50 | 60 | 230 |
| <i>CCDC73</i>         | TTGATACAATAAAGGGAACCCAGT  | 24 | 38 | 60 | TCCGTAACATTCGAGGTTTG     | 20 | 45 | 59 | 325 |
| <i>PPP1R32</i>        | CTCCCTTCTGGTGGTTCTGT      | 20 | 55 | 59 | CTCCTGCACAAGAGGGGTAG     | 20 | 60 | 60 | 230 |
| <i>EXOC3L4</i>        | AACAAGCAGCAGGAAAGAGC      | 20 | 50 | 60 | CTCGGGTTTCAGTTCCTCAG     | 20 | 55 | 60 | 298 |
| <i>CACNA1H</i>        | CATGAACTACCCACGATCC       | 20 | 55 | 60 | GAATGACACACCGGAGACC      | 19 | 58 | 59 | 249 |

|                 |                            |    |    |    |                            |    |    |    |     |
|-----------------|----------------------------|----|----|----|----------------------------|----|----|----|-----|
| <i>KATNB1</i>   | AGGTGCAGTGCTGAATACCC       | 20 | 55 | 60 | CCCCTCTGCAGCCACTTAC        | 19 | 63 | 61 | 223 |
| <i>SYNE1</i>    | AGAGGTAGAAAGCAGTTCTCATAATC | 26 | 38 | 58 | GAATGATTACACAAGAATAACACAAA | 25 | 28 | 57 | 239 |
| <i>GAL</i>      | CCTGTAGCATGTGTCGTGGT       | 20 | 55 | 60 | TGCATAAATTGGCCGAAGAT       | 20 | 40 | 60 | 235 |
| <i>CELSR3</i>   | TCAGGGAGCCTATCTTCGTG       | 20 | 55 | 60 | TGCCGAATCAAAAAGTCTGA       | 20 | 40 | 59 | 298 |
| <i>PSIP1</i>    | TTGGTTGGTTTCAGTCTTTTCA     | 22 | 36 | 60 | CCCTCAAAACAAGTTTCAACA      | 22 | 36 | 59 | 299 |
| <i>TRAPPC6A</i> | GAGGGTTGCATTGCTCCAT        | 19 | 53 | 61 | TGGCTTCCCTTAGAGGATCA       | 20 | 50 | 60 | 373 |
| <i>WASF2</i>    | AGTGTGGTCAGCCCAAGC         | 18 | 61 | 60 | GGTAGTCAGCTGCTGGTGGT       | 20 | 60 | 60 | 250 |
| <i>PICALM</i>   | TGCACAGATCCTTTCTCTGCT      | 21 | 48 | 60 | TGCAGTGCTTTTAAAATAATTAATGG | 26 | 27 | 60 | 247 |
| <i>NXF1</i>     | GAATGAACTGAAGCCAGAACAA     | 22 | 41 | 59 | CTGAGAACTACTGCTGTCAACCA    | 23 | 48 | 60 | 240 |
| <i>STXBP1</i>   | TTTGTGGAAGAAACGGGAAC       | 20 | 45 | 60 | AACCTTAAGGCCGGAGGAG        | 19 | 58 | 60 | 338 |
| <i>SHROOM4</i>  | TCTCTTTTGTGGCATGGGTA       | 20 | 45 | 59 | TGGTTAGGTACATGTTCTGGTC     | 23 | 48 | 60 | 250 |
| <i>CACNA1G</i>  | TGGAGCTCTTTGGAGACCTG       | 20 | 55 | 60 | CTGTGGAGACTCGGAAGAGG       | 20 | 60 | 60 | 212 |
| <i>ZFX</i>      | GTGCCCAGATATCATGGAAGA      | 21 | 48 | 60 | CGTCGGTAGTCAGAGGATCAG      | 21 | 57 | 60 | 293 |
| <i>TMEM18</i>   | TCCACATCAGCTCTCTCAA        | 20 | 50 | 60 | CACATGAAGAAAGACAAGTAAAG    | 24 | 38 | 58 | 232 |



|                        |                             |    |    |    |                            |    |    |    |     |
|------------------------|-----------------------------|----|----|----|----------------------------|----|----|----|-----|
| <i>DROSHA</i>          | AAATCACATTGAGATGAGATAATTTTT | 27 | 22 | 58 | CCACTGAATTGTATGCTTTAAATGAG | 26 | 35 | 60 | 248 |
| <i>MAGEL2</i>          | CCCTAGCACCTCCAGGAT          | 18 | 61 | 58 | CCTCTCATCCAAGGGAGACA       | 20 | 55 | 60 | 226 |
| <i>DKK3</i>            | GACCTCGGCTCCAGTCAA          | 18 | 61 | 60 | CGCTCTTCCATGCCTTCC         | 18 | 61 | 62 | 212 |
| <i>RPGRIP1L</i>        | TTTCCTGCTCTTTTCTCCCTA       | 21 | 43 | 58 | CCAGCTTCCCATGAATTATAGA     | 22 | 41 | 58 | 250 |
| <i>MAST4</i>           | CACACTGACAGGGCTCCTCTA       | 21 | 57 | 61 | CGGGCTTTTGTCTGTCTGTC       | 20 | 55 | 61 | 249 |
| <i>SMARCA1</i>         | TGCACATTCAATTAAGCACT        | 22 | 32 | 58 | GCAGTCCTAGACTTGATAAACCA    | 23 | 43 | 58 | 250 |
| <i>FXR2</i>            | GCAGCGACAAGGCTGGATA         | 19 | 58 | 62 | CCCAGCCAATCAATCACTTT       | 20 | 45 | 60 | 245 |
| <i>HEXDC</i>           | AAAAACGGACCCTGTTAGGC        | 20 | 50 | 60 | AGCAGCGCATCCACAGAG         | 18 | 61 | 61 | 197 |
| <i>HTT</i>             | GGAAATGATGGGAGCAGGTA        | 20 | 50 | 60 | CCGTGGTGTCAAGAGGAACT       | 20 | 55 | 60 | 228 |
| <i>RIN2</i>            | GGGCTGCCTTCTTCTTCTTC        | 20 | 55 | 60 | CTTCTCTTCACCTGCGCTTC       | 20 | 55 | 60 | 300 |
| <i>BNIP2</i>           | TTTTCTTTGTGTGTGTGTGTTTTT    | 24 | 29 | 59 | TCAAAATATAGCTCTGTATCCCATAA | 26 | 30 | 58 | 231 |
| <i>PSMD1</i>           | TGCTACTTTCAGTTGGATGTTTT     | 23 | 35 | 58 | GAGCATCAGCCTCTTCCATC       | 20 | 55 | 60 | 246 |
| <i>TCTN2 (exon 6)</i>  | CAGCTCCTGCCTTTATGTTTG       | 21 | 48 | 60 | GCGGCTGCTCAGACACTTAC       | 20 | 60 | 61 | 249 |
| <i>TCTN2 (exon 14)</i> | GTGAAACCCGGACATTCCT         | 20 | 50 | 60 | TCACAGCAACCAAGTTACAGG      | 21 | 48 | 59 | 236 |

|               |                      |    |    |    |                        |    |    |    |     |
|---------------|----------------------|----|----|----|------------------------|----|----|----|-----|
| <i>RRAS2</i>  | GCCTCCCAGAGCATAGGATT | 20 | 55 | 61 | CGGGCTGCTCTGTCATCTAT   | 20 | 55 | 60 | 162 |
| <i>RGS4</i>   | GCAGAGCGGTCGTCTGAT   | 18 | 61 | 60 | GCAATCTTACCTCCTCAAGCA  | 21 | 48 | 60 | 249 |
| <i>LIG4</i>   | CTGCACCTTGCGTTTCC    | 18 | 57 | 60 | TGGCTATCTGTTCCACTCATAA | 22 | 41 | 57 | 300 |
| <i>GABBR2</i> | GGGGAGTATTTGTCCCCATC | 20 | 55 | 60 | CCCTGAAACAGAAGGAGAGTG  | 21 | 52 | 59 | 244 |
| <i>RCC2</i>   | AGGAAATGTTGCCGTGATTC | 20 | 45 | 60 | CCCAAACAGACTGCGATGAT   | 20 | 50 | 61 | 249 |
| <i>ITGA7</i>  | GGGCATTGACATTTCCAAAC | 20 | 45 | 60 | CACAGCTCAGCCTCTCCTCT   | 20 | 60 | 60 | 266 |
| <i>ZNF238</i> | CACATAGCAGGCGATTTGC  | 19 | 53 | 60 | CTCACGGAGGTGACAGACCT   | 20 | 60 | 60 | 245 |

## References

- 1 Neul JL, Kaufmann WE, Glaze DG, *et al.* Rett syndrome: revised diagnostic criteria and nomenclature. *Ann Neurol* 2010;**68**:944–50. doi:10.1002/ana.22124
- 2 Spurlock G, Williams J, McGuffin P, *et al.* European Multicentre Association Study of Schizophrenia: a study of the DRD2 Ser311Cys and DRD3 Ser9Gly polymorphisms. *Am J Med Genet* 1998;**81**:24–8.
- 3 Lucotte G, Lagarde JP, Funalot B, *et al.* Linkage with the Ser9Gly DRD3 polymorphism in essential tremor families. *Clin Genet* 2006;**69**:437–40. doi:10.1111/j.1399-0004.2006.00600.x
- 4 Vuillaume M-L, Delrue M-A, Naudion S, *et al.* Expanding the clinical phenotype at the 3q13.31 locus with a new case of microdeletion and first characterization of the reciprocal duplication. *Mol Genet Metab* 2013;**110**:90–7. doi:10.1016/j.ymgme.2013.07.013
- 5 Wiśniowiecka-Kowalnik B, Kastory-Bronowska M, Bartnik M, *et al.* Application of custom-designed oligonucleotide array CGH in 145 patients with autistic spectrum disorders. *Eur J Hum Genet EJHG* 2013;**21**:620–5. doi:10.1038/ejhg.2012.219
- 6 Nguyen GD, Molero AE, Gokhan S, *et al.* Functions of Huntingtin in Germ Layer Specification and Organogenesis. *PLoS ONE* 2013;**8**:e72698. doi:10.1371/journal.pone.0072698
- 7 McFarland KN, Huizenga MN, Darnell SB, *et al.* McCP2: a novel Huntingtin interactor. *Hum Mol Genet* 2014;**23**:1036–44. doi:10.1093/hmg/ddt499
- 8 Reiss AL, Faruque F, Naidu S, *et al.* Neuroanatomy of Rett syndrome: A volumetric imaging study. *Ann Neurol* 1993;**34**:227–34. doi:10.1002/ana.410340220
- 9 MacArthur DG, Balasubramanian S, Frankish A, *et al.* A Systematic Survey of Loss-of-Function Variants in Human Protein-Coding Genes. *Science* 2012;**335**:823–8. doi:10.1126/science.1215040
- 10 Duyao MP, Auerbach AB, Ryan A, *et al.* Inactivation of the mouse Huntington's disease gene homolog Hdh. *Science* 1995;**269**:407–10.
- 11 Eckey M, Kuphal S, Straub T, *et al.* Nucleosome Remodeler SNF2L Suppresses Cell Proliferation and Migration and Attenuates Wnt Signaling. *Mol Cell Biol* 2012;**32**:2359–71. doi:10.1128/MCB.06619-11
- 12 Yip DJ, Corcoran CP, Alvarez-Saavedra M, *et al.* Snf2l Regulates Foxg1-Dependent Progenitor Cell Expansion in the Developing Brain. *Dev Cell* 2012;**22**:871–8. doi:10.1016/j.devcel.2012.01.020
- 13 Hussain RH, Zawawi M, Bayfield MA. Conservation of RNA chaperone activity of the human La-related proteins 4, 6 and 7. *Nucleic Acids Res* 2013;**41**:8715–25. doi:10.1093/nar/gkt649

- 14 Merret R, Martino L, Bousquet-Antonelli C, *et al.* The association of a La module with the PABP-interacting motif PAM2 is a recurrent evolutionary process that led to the neofunctionalization of La-related proteins. *RNA N Y N* 2013;**19**:36–50. doi:10.1261/rna.035469.112
- 15 Yang R, Gaidamakov SA, Xie J, *et al.* La-related protein 4 binds poly(A), interacts with the poly(A)-binding protein MLLE domain via a variant PAM2w motif, and can promote mRNA stability. *Mol Cell Biol* 2011;**31**:542–56. doi:10.1128/MCB.01162-10
- 16 Blein S, Hawrot E, Barlow P. The metabotropic GABA receptor: molecular insights and their functional consequences. *Cell Mol Life Sci CMLS* 2000;**57**:635–50.
- 17 Wang Q. Integrative Genomics Identifies Distinct Molecular Classes of Neuroblastoma and Shows That Multiple Genes Are Targeted by Regional Alterations in DNA Copy Number. *Cancer Res* 2006;**66**:6050–62. doi:10.1158/0008-5472.CAN-05-4618
- 18 Fatemi SH, Folsom TD, Thuras PD. Deficits in GABA(B) receptor system in schizophrenia and mood disorders: a postmortem study. *Schizophr Res* 2011;**128**:37–43. doi:10.1016/j.schres.2010.12.025
- 19 Fatemi SH, Folsom TD, Reutiman TJ, *et al.* Expression of GABA(B) receptors is altered in brains of subjects with autism. *Cerebellum Lond Engl* 2009;**8**:64–9. doi:10.1007/s12311-008-0075-3
- 20 Hedges DJ, Hamilton-Nelson KL, Sacharow SJ, *et al.* Evidence of novel fine-scale structural variation at autism spectrum disorder candidate loci. *Mol Autism* 2012;**3**:2. doi:10.1186/2040-2392-3-2
- 21 EuroEPINOMICS-RES Consortium, Epilepsy Phenome/Genome Project, Epi4K Consortium. De novo mutations in synaptic transmission genes including DNMI1 cause epileptic encephalopathies. *Am J Hum Genet* 2014;**95**:360–70. doi:10.1016/j.ajhg.2014.08.013
- 22 Lee S, Kozlov S, Hernandez L, *et al.* Expression and imprinting of MAGEL2 suggest a role in Prader-willi syndrome and the homologous murine imprinting phenotype. *Hum Mol Genet* 2000;**9**:1813–9.
- 23 Schaaf CP, Gonzalez-Garay ML, Xia F, *et al.* Truncating mutations of MAGEL2 cause Prader-Willi phenotypes and autism. *Nat Genet* 2013;**45**:1405–8. doi:10.1038/ng.2776
- 24 Wilkins A, Ping Q, Carpenter CL. RhoBTB2 is a substrate of the mammalian Cul3 ubiquitin ligase complex. *Genes Dev* 2004;**18**:856–61. doi:10.1101/gad.1177904
- 25 Kong A, Frigge ML, Masson G, *et al.* Rate of de novo mutations and the importance of father's age to disease risk. *Nature* 2012;**488**:471–5. doi:10.1038/nature11396

- 26 O’Roak BJ, Vives L, Girirajan S, *et al.* Sporadic autism exomes reveal a highly interconnected protein network of de novo mutations. *Nature* 2012;**485**:246–50. doi:10.1038/nature10989
- 27 Siripurapu V, Meth J, Kobayashi N, *et al.* DBC2 significantly influences cell-cycle, apoptosis, cytoskeleton and membrane-trafficking pathways. *J Mol Biol* 2005;**346**:83–9. doi:10.1016/j.jmb.2004.11.043
- 28 Villa N, Do A, Hershey JWB, *et al.* Human eukaryotic initiation factor 4G (eIF4G) protein binds to eIF3c, -d, and -e to promote mRNA recruitment to the ribosome. *J Biol Chem* 2013;**288**:32932–40. doi:10.1074/jbc.M113.517011
- 29 Fujioka S, Sundal C, Strongosky AJ, *et al.* Sequence variants in eukaryotic translation initiation factor 4-gamma (eIF4G1) are associated with Lewy body dementia. *Acta Neuropathol (Berl)* 2013;**125**:425–38. doi:10.1007/s00401-012-1059-4
- 30 Blanckenberg J, Ntsapi C, Carr JA, *et al.* EIF4G1 R1205H and VPS35 D620N mutations are rare in Parkinson’s disease from South Africa. *Neurobiol Aging* 2014;**35**:445.e1–3. doi:10.1016/j.neurobiolaging.2013.08.023
- 31 Li K, Tang B, Guo J, *et al.* Analysis of EIF4G1 in ethnic Chinese. *BMC Neurol* 2013;**13**:38. doi:10.1186/1471-2377-13-38
- 32 Puschmann A. Monogenic Parkinson’s disease and parkinsonism: clinical phenotypes and frequencies of known mutations. *Parkinsonism Relat Disord* 2013;**19**:407–15. doi:10.1016/j.parkreldis.2013.01.020
- 33 Sudhaman S, Behari M, Govindappa ST, *et al.* VPS35 and EIF4G1 mutations are rare in Parkinson’s disease among Indians. *Neurobiol Aging* 2013;**34**:2442.e1–3. doi:10.1016/j.neurobiolaging.2013.04.025
- 34 Shaheen R, Fageih E, Seidahmed MZ, *et al.* A TCTN2 mutation defines a novel Meckel Gruber syndrome locus. *Hum Mutat* 2011;**32**:573–8. doi:10.1002/humu.21507
- 35 Sang L, Miller JJ, Corbit KC, *et al.* Mapping the NPHP-JBTS-MKS protein network reveals ciliopathy disease genes and pathways. *Cell* 2011;**145**:513–28. doi:10.1016/j.cell.2011.04.019
- 36 Nishiyama M, Skoultchi AI, Nakayama KI. Histone H1 recruitment by CHD8 is essential for suppression of the Wnt- $\beta$ -catenin signaling pathway. *Mol Cell Biol* 2012;**32**:501–12. doi:10.1128/MCB.06409-11
- 37 Kobayashi M, Kishida S, Fukui A, *et al.* Nuclear localization of Duplin, a beta-catenin-binding protein, is essential for its inhibitory activity on the Wnt signaling pathway. *J Biol Chem* 2002;**277**:5816–22. doi:10.1074/jbc.M108433200
- 38 Kang H, Chen I-M, Wilson CS, *et al.* Gene expression classifiers for relapse-free survival and minimal residual disease improve risk classification and outcome prediction in pediatric B-precursor acute lymphoblastic leukemia. *Blood* 2010;**115**:1394–405. doi:10.1182/blood-2009-05-218560

- 39 Smirnov DA, Morley M, Shin E, *et al.* Genetic analysis of radiation-induced changes in human gene expression. *Nature* 2009;**459**:587–91. doi:10.1038/nature07940
- 40 Krumm N, O’Roak BJ, Shendure J, *et al.* A de novo convergence of autism genetics and molecular neuroscience. *Trends Neurosci* 2014;**37**:95–105. doi:10.1016/j.tins.2013.11.005
- 41 Neale BM, Kou Y, Liu L, *et al.* Patterns and rates of exonic de novo mutations in autism spectrum disorders. *Nature* 2012;**485**:242–5. doi:10.1038/nature11011
- 42 O’Roak BJ, Vives L, Fu W, *et al.* Multiplex targeted sequencing identifies recurrently mutated genes in autism spectrum disorders. *Science* 2012;**338**:1619–22. doi:10.1126/science.1227764
- 43 Talkowski ME, Rosenfeld JA, Blumenthal I, *et al.* Sequencing chromosomal abnormalities reveals neurodevelopmental loci that confer risk across diagnostic boundaries. *Cell* 2012;**149**:525–37. doi:10.1016/j.cell.2012.03.028
- 44 Aasland R, Stewart AF, Gibson T. The SANT domain: a putative DNA-binding domain in the SWI-SNF and ADA complexes, the transcriptional co-repressor N-CoR and TFIIB. *Trends Biochem Sci* 1996;**21**:87–8.
- 45 Bardwell VJ, Treisman R. The POZ domain: a conserved protein-protein interaction motif. *Genes Dev* 1994;**8**:1664–77.
- 46 Gorbalenya AE, Koonin EV, Donchenko AP, *et al.* Two related superfamilies of putative helicases involved in replication, recombination, repair and expression of DNA and RNA genomes. *Nucleic Acids Res* 1989;**17**:4713–30.
- 47 Buffart TE, Israeli D, Tijssen M, *et al.* Across array comparative genomic hybridization: a strategy to reduce reference channel hybridizations. *Genes Chromosomes Cancer* 2008;**47**:994–1004. doi:10.1002/gcc.20605
- 48 Sanders SJ, Ercan-Sencicek AG, Hus V, *et al.* Multiple recurrent de novo CNVs, including duplications of the 7q11.23 Williams syndrome region, are strongly associated with autism. *Neuron* 2011;**70**:863–85. doi:10.1016/j.neuron.2011.05.002
- 49 Wang K, Li M, Hadley D, *et al.* PennCNV: an integrated hidden Markov model designed for high-resolution copy number variation detection in whole-genome SNP genotyping data. *Genome Res* 2007;**17**:1665–74. doi:10.1101/gr.6861907
- 50 Colella S, Yau C, Taylor JM, *et al.* QuantiSNP: an Objective Bayes Hidden-Markov Model to detect and accurately map copy number variation using SNP genotyping data. *Nucleic Acids Res* 2007;**35**:2013–25. doi:10.1093/nar/gkm076
- 51 Illumina. DNA Copy Number and Loss of Heterozygosity Analysis Algorithms. 2013.[http://www.google.pt/url?sa=t&rct=j&q=&esrc=s&source=web&cd=1&ved=0CDEQFjAA&url=http%3A%2F%2Fres.illumina.com%2Fdocuments%2Fproducts%2Ftechnotes%2Ftechnote\\_cnv\\_algorithms.pdf&ei=XYFWU62wluKk0QX-yIDgAw&usg=AFQjCNGPmHgIQLQ0YFdD7hya3mv\\_5lp8TQ&bvm=bv.65177938,d.bGQ&cad=rja](http://www.google.pt/url?sa=t&rct=j&q=&esrc=s&source=web&cd=1&ved=0CDEQFjAA&url=http%3A%2F%2Fres.illumina.com%2Fdocuments%2Fproducts%2Ftechnotes%2Ftechnote_cnv_algorithms.pdf&ei=XYFWU62wluKk0QX-yIDgAw&usg=AFQjCNGPmHgIQLQ0YFdD7hya3mv_5lp8TQ&bvm=bv.65177938,d.bGQ&cad=rja) (accessed 22 Apr2014).

- 52 Welcome to the ISCA Consortium web site. <https://www.iscaconsortium.org/> (accessed 24 Jul2014).
- 53 Firth HV, Richards SM, Bevan AP, *et al.* DECIPHER: Database of Chromosomal Imbalance and Phenotype in Humans Using Ensembl Resources. *Am J Hum Genet* 2009;**84**:524–33. doi:10.1016/j.ajhg.2009.03.010
- 54 Edelman L, Hirschhorn K. Clinical utility of array CGH for the detection of chromosomal imbalances associated with mental retardation and multiple congenital anomalies. *Ann N Y Acad Sci* 2009;**1151**:157–66. doi:10.1111/j.1749-6632.2008.03610.x
- 55 Primer3Plus. <http://www.bioinformatics.nl/cgi-bin/primer3plus/primer3plus.cgi> (accessed 5 Aug2014).
- 56 Hoebeeck J, van der Lijst R, Poppe B, *et al.* Rapid detection of VHL exon deletions using real-time quantitative PCR. *Lab Invest J Tech Methods Pathol* 2005;**85**:24–33. doi:10.1038/labinvest.3700209
- 57 Hoischen A, van Bon BWM, Gilissen C, *et al.* De novo mutations of SETBP1 cause Schinzel-Giedion syndrome. *Nat Genet* 2010;**42**:483–5. doi:10.1038/ng.581
- 58 Ameer A, Bunikis I, Enroth S, *et al.* CanvasDB: a local database infrastructure for analysis of targeted- and whole genome re-sequencing projects. *Database J Biol Databases Curation* 2014;**2014**. doi:10.1093/database/bau098
- 59 Exome Variant Server. <http://evs.gs.washington.edu/EVS/> (accessed 24 Jul2014).
- 60 1000 Genomes Project Consortium, Abecasis GR, Auton A, *et al.* An integrated map of genetic variation from 1,092 human genomes. *Nature* 2012;**491**:56–65. doi:10.1038/nature11632
- 61 Robinson JT, Thorvaldsdóttir H, Winckler W, *et al.* Integrative genomics viewer. *Nat Biotechnol* 2011;**29**:24–6. doi:10.1038/nbt.1754
- 62 Warde-Farley D, Donaldson SL, Comes O, *et al.* The GeneMANIA prediction server: biological network integration for gene prioritization and predicting gene function. *Nucleic Acids Res* 2010;**38**:W214–220. doi:10.1093/nar/gkq537
- 63 Hawrylycz MJ, Lein ES, Guillozet-Bongaarts AL, *et al.* An anatomically comprehensive atlas of the adult human brain transcriptome. *Nature* 2012;**489**:391–9. doi:10.1038/nature11405
- 64 Microarray Data :: Allen Brain Atlas: Human Brain. <http://human.brain-map.org/> (accessed 16 Jun2014).
- 65 Blake JA, Bult CJ, Eppig JT, *et al.* The Mouse Genome Database: integration of and access to knowledge about the laboratory mouse. *Nucleic Acids Res* 2014;**42**:D810–817. doi:10.1093/nar/gkt1225
- 66 Ng PC, Henikoff S. Predicting deleterious amino acid substitutions. *Genome Res* 2001;**11**:863–74. doi:10.1101/gr.176601

- 67 Adzhubei IA, Schmidt S, Peshkin L, *et al.* A method and server for predicting damaging missense mutations. *Nat Methods* 2010;**7**:248–9. doi:10.1038/nmeth0410-248
- 68 Reva B, Antipin Y, Sander C. Predicting the functional impact of protein mutations: application to cancer genomics. *Nucleic Acids Res* 2011;**39**:e118. doi:10.1093/nar/gkr407
- 69 Schwarz JM, Rödelberger C, Schuelke M, *et al.* MutationTaster evaluates disease-causing potential of sequence alterations. *Nat Methods* 2010;**7**:575–6. doi:10.1038/nmeth0810-575
- 70 Ferrer-Costa C, Gelpí JL, Zamakola L, *et al.* PMUT: a web-based tool for the annotation of pathological mutations on proteins. *Bioinforma Oxf Engl* 2005;**21**:3176–8. doi:10.1093/bioinformatics/bti486
- 71 González-Pérez A, López-Bigas N. Improving the assessment of the outcome of nonsynonymous SNVs with a consensus deleteriousness score, Condel. *Am J Hum Genet* 2011;**88**:440–9. doi:10.1016/j.ajhg.2011.03.004
- 72 Pollard KS, Hubisz MJ, Rosenbloom KR, *et al.* Detection of nonneutral substitution rates on mammalian phylogenies. *Genome Res* 2010;**20**:110–21. doi:10.1101/gr.097857.109
- 73 Davydov EV, Goode DL, Sirota M, *et al.* Identifying a high fraction of the human genome to be under selective constraint using GERP++. *PLoS Comput Biol* 2010;**6**:e1001025. doi:10.1371/journal.pcbi.1001025
- 74 Stenson PD, Ball EV, Mort M, *et al.* Human Gene Mutation Database (HGMD): 2003 update. *Hum Mutat* 2003;**21**:577–81. doi:10.1002/humu.10212
- 75 Landrum MJ, Lee JM, Riley GR, *et al.* ClinVar: public archive of relationships among sequence variation and human phenotype. *Nucleic Acids Res* 2014;**42**:D980–985. doi:10.1093/nar/gkt1113
- 76 Home - PubMed - NCBI. <http://www.ncbi.nlm.nih.gov/pubmed> (accessed 5 Aug2014).
- 77 Home - OMIM - NCBI. <http://www.ncbi.nlm.nih.gov/omim> (accessed 5 Aug2014).
- 78 Home - Gene - NCBI. <http://www.ncbi.nlm.nih.gov/gene> (accessed 5 Aug2014).
- 79 GeneCards - Human Genes | Gene Database | Gene Search. <http://www.genecards.org/> (accessed 5 Aug2014).
- 80 Warde-Farley D, Donaldson SL, Comes O, *et al.* The GeneMANIA prediction server: biological network integration for gene prioritization and predicting gene function. *Nucleic Acids Res* 2010;**38**:W214–220. doi:10.1093/nar/gkq537
- 81 Hawrylycz MJ, Lein ES, Guillozet-Bongaarts AL, *et al.* An anatomically comprehensive atlas of the adult human brain transcriptome. *Nature* 2012;**489**:391–9. doi:10.1038/nature11405



- 82 Microarray Data :: Allen Brain Atlas: Human Brain. <http://human.brain-map.org/> (accessed 5 Aug2014).
- 83 Blake JA, Bult CJ, Eppig JT, *et al.* The Mouse Genome Database: integration of and access to knowledge about the laboratory mouse. *Nucleic Acids Res* 2014;**42**:D810–817. doi:10.1093/nar/gkt1225
- 84 Mostafavi S, Ray D, Warde-Farley D, *et al.* GeneMANIA: a real-time multiple association network integration algorithm for predicting gene function. *Genome Biol* 2008;**9 Suppl 1**:S4. doi:10.1186/gb-2008-9-s1-s4
